## **Efficient cooperation of chloroplasts and mitochondria enhances ATP and sucrose production**

Chia Pao Voon<sup>1,†</sup>, Yee-Song Law<sup>1,†</sup>, Xiaoqian Guan<sup>1,†</sup>, Zhou Xu<sup>1</sup>, Wing-Tung Chu<sup>1</sup>, Renshan Zhang<sup>1</sup>, Feng Sun<sup>1</sup>, Mathias Labs<sup>2, &</sup>, Mathias Pribil<sup>2, ‡</sup>, Dario Leister<sup>2</sup>, Marie Hronková<sup>3</sup>, Jiří Kubásek<sup>3</sup>, Yong Cui<sup>4,8</sup>, Liwen Jiang<sup>4,8</sup>, Michito Tsuyama<sup>5</sup>, Per Gardeström<sup>6</sup>, Mikko Tikkanen<sup>7</sup>, Boon Leong Lim<sup>1,8\*</sup>

<sup>1</sup>School of Biological Sciences, the University of Hong Kong, Pokfulam, Hong Kong, China.

<sup>2</sup>Plant Molecular Biology, Department of Biology, Ludwig-Maximilians-University Munich (LMU), D-82152 Planegg-Martinsried, Germany.

<sup>3</sup>Faculty of Science, University of South Bohemia, Branisovska 31, 370 05 Ceske Budejovice, Czech Republic.

<sup>4</sup>School of Life Sciences, Centre for Cell and Developmental Biology, The Chinese University of Hong Kong, Shatin, Hong Kong, China.

<sup>5</sup>Department of Agriculture, Kyushu University, Fukuoka 812-8581, Japan.

<sup>6</sup>Umeå Plant Science Centre, Department of Plant Physiology, Umeå University, SE-901 87 Umeå, Sweden.

<sup>7</sup>Department of Biochemistry and Food Chemistry, Molecular Plant Biology, University of Turku, FI-20014 Turku, Finland.

<sup>8</sup>State Key Laboratory of Agrobiotechnology, The Chinese University of Hong Kong, Shatin, Hong Kong, China.

† These authors contributed equally to this work.

\*Corresponding author: Boon Leong Lim ([blim@hku.hk](mailto:blim@hku.hk)); Tel.: (852) 22990826

& Current address: KWS SAAT SE, Gateway Research Center, St. Louis, MO, USA.

‡ Current address: Copenhagen Plant Science Centre (CPSC), Department of Plant and Environmental Sciences, University of Copenhagen, Thorvaldsensvej 40, 1871 Frederiksberg C, Denmark.

**Running title:** Cooperation of chloroplasts and mitochondria

1    **ABSTRACT**

2    Efficient photosynthesis requires a balance of ATP and NADPH production/consumption in  
3    chloroplasts as the linear electron flow generates a higher NADPH/ATP ratio than that is  
4    consumed by the Calvin-Benson-Bassham cycle. Recent works suggested that ATP importation  
5    into mature chloroplasts of *Arabidopsis thaliana* is negligible, and therefore the exportation of  
6    reducing equivalents from chloroplasts is important for balancing stromal ATP/NADPH ratio.  
7    Here we showed that the overexpression of purple acid phosphatase 2 on the outer membranes  
8    of chloroplasts and mitochondria can streamline the production and consumption of reducing  
9    equivalents in these two organelles, respectively. A higher capacity of consumption of reducing  
10   equivalents in mitochondria can indirectly help chloroplasts to balance the ATP/NADPH ratio  
11   in stroma and recycle NADP<sup>+</sup>, the electron acceptors of the linear electron flow. A higher rate  
12   of ATP and NADPH production from the linear electron flow, a higher capacity of carbon  
13   fixation by the Calvin-Benson-Bassham cycle and a greater consumption of NADH in  
14   mitochondria, enhance photosynthesis in the chloroplasts, ATP production in the mitochondria,  
15   sucrose synthesis in the cytosol, and eventually boosting plant growth and seed yields in the  
16   overexpression lines.

17

18    **Keywords**

19    *Arabidopsis thaliana*, ATP, AtPAP2, chloroplasts, mitochondria, NADPH, photosynthesis,  
20    photosystem

21

22    **Significance Statement**

23    This study demonstrates the importance of chloroplast-mitochondria cooperation in redox  
24    balance and illustrates that an optimized function of mitochondria can enhance the efficiency  
25    of photosynthesis.

26

27

## 28 Introduction

29 In plant cells, chloroplasts convert light energy into chemical energy, and mitochondria  
30 consume the chemical energy to produce ATP. The optimal carbon fixation and plant growth  
31 require these two energy-transforming organelles to perform strictly coordinated actions. Both  
32 organelles utilize protein complexes to construct electron transport chains (ETC), which are  
33 responsible for the formation (chloroplasts) or consumption (mitochondria) of reducing  
34 equivalents, translocation of protons, and the build-up of the proton gradient as a driving force  
35 for ATP synthesis. The cooperation between the chloroplasts and mitochondria, which was  
36 invented over 1.5 billion years ago, is nowadays much more complicated than the relationship  
37 between a supplier and a consumer in modern plant cells (Duttilleul et al., 2003; Noguchi and  
38 Yoshida, 2008). In chloroplasts, the linear electron flow (LEF) generates ATP/NADPH at a  
39 ratio of approximately 1.28, and the fixation of carbon dioxide consumes ATP/NADPH at a  
40 ratio of 1.5 (Allen, 2003; Foyer et al., 2012). Therefore, the photosynthetic efficiency requires  
41 the production and consumption of ATP and reductants at appropriate ratios in the chloroplasts,  
42 and this process is complicated by their fluxes across the chloroplast inner membrane. Our  
43 recent study showed that, in order to limit energy expenditure of chloroplasts in the dark, the  
44 import of cytosolic ATP into mature chloroplasts is negligible (Voon et al., 2018; Voon and Lim,  
45 2019). Hence, during photosynthesis the ATP/NADPH ratio can either be balanced by extra  
46 ATP production from the cyclic electron flow (CEF) or the export of excess reductants to the  
47 cytosol (Sato et al., 2019; Selinski and Scheibe, 2019). In addition, photorespiration also  
48 generates a large amount of NADH in mitochondria and surplus reducing equivalents are  
49 exported to the cytosol through the malate-oxaloacetate (OAA) shuttle (Lim et al., 2020).  
50 Hence, surplus reducing equivalents generated during photosynthesis have to be stored as  
51 malate in the vacuole (Gerhardt et al., 1987). Light-dependent production of reducing  
52 equivalents in mitochondria is supported by the observation that illumination can cause a rapid  
53 pH change in the mitochondrial matrix, which was unseen when DCMU was applied (Voon et  
54 al., 2018). Furthermore, when the mitochondrial ETC was interfered by inhibitors,  
55 photosynthetic ATP production in stroma was also affected (Voon et al., 2018). Here, by  
56 studying the physiology of transgenic lines that overexpress *Arabidopsis thaliana* purple acid  
57 phosphatase 2 (AtPAP2), we showed that efficient cooperation of chloroplasts and  
58 mitochondria in optimizing reductant production in chloroplasts and consumption in  
59 chloroplasts and mitochondria is important for enhancing photosynthesis and productivity.

60 AtPAP2 is anchored on the outer membranes of chloroplasts and mitochondria and plays

61 a role in protein import into these two organelles (Law et al., 2015; Sun et al., 2012a; Zhang et  
62 al., 2016). The overexpression of AtPAP2 in *Arabidopsis thaliana* resulted in earlier bolting  
63 (Supplemental Fig. S1; Supplemental Video S1), a higher seed yield (+40-50%), and higher  
64 leaf sugar and ATP levels (Liang et al., 2015; Sun et al., 2013; Sun et al., 2012b). The  
65 overexpression of AtPAP2 also promotes plant growth and seed yield of the biofuel crop  
66 *Camelina sativa* (Zhang et al., 2012). Similarly to Toc33/34 and Tom20s, AtPAP2 is anchored  
67 onto the outer membranes of chloroplasts and mitochondria via its hydrophobic C-terminal  
68 motif (Sun et al., 2012a). AtPAP2 interacts with the precursor of the small subunit of RuBisCO  
69 (pSSU) (Zhang et al., 2016) and the presequences of a number of multiple organellar RNA  
70 editing factor (pMORF) proteins (Law et al., 2015) and plays a role in their import into  
71 chloroplasts (Zhang et al., 2016) and mitochondria (Law et al., 2015), respectively. Here, we  
72 examined how AtPAP2 overexpression affects the physiology of chloroplasts and mitochondria  
73 and how these two energy-generating organelles orchestrate to produce more sugars and ATP  
74 in leaf cells. Our data suggest that the efficiency of photosynthesis is dependent on the activities  
75 of the mitochondria. Surplus reducing equivalents generated from the LEF have to be exported  
76 and dissipated; and mitochondria that more actively dissipate the reducing equivalents can  
77 supply more ATP to the cytosol, thereby simultaneously relieving the pressure of over-  
78 reduction of ETC in the chloroplast (Scheibe et al., 2005). This streamlined cooperation enables  
79 a higher efficacy in carbon fixation, sucrose synthesis and ATP production in leaf cells.

80

## 81 **Results**

82 ***Overexpression of AtPAP2 changes the composition of the thylakoid membrane.*** Using  
83 transmission electron microscopy (TEM), alterations in the ultrastructure of the thylakoid  
84 membrane of mesophyll chloroplasts were observed in the OE lines (Fig. 1). The average  
85 diameters of the grana stacks were approximately 0.43  $\mu\text{m}$  in all four lines, which is consistent  
86 with a previous report (Armbruster et al., 2013). Conversely, the average heights of the grana  
87 stacks in the OE7 and OE21 chloroplasts were smaller than the average heights of the grana  
88 stacks in the wild-type (WT) and *pap2* lines (Fig. 1). The decreased stacking may be due to the  
89 decreased amount of PSII (Fig. 2). An analysis of the photosynthetic pigments revealed that  
90 chlorophyll a, chlorophyll b, lutein and  $\beta$ -carotene were reduced in the two OE lines. The  
91 reduced chlorophyll content in the OE lines correlates with the reduction in the grana stacking.  
92 The level of violaxanthin was, however, unaltered, suggesting that the xanthophyll cycle in the  
93 OE plants was suppressed to minimize the thermal loss of the excitation energy (Supplemental

94 Table S1).

95

96 ***Overexpression of AtPAP2 changes the compositions of the photosystems and respiratory***

97 ***chain.*** 2D BN/SDS-PAGE DIGE revealed that the abundances of specific photosystem

98 components were altered in the OE7 chloroplasts (Fig. 2A). The protein levels of the

99 photosystem II (PSII) core proteins PsbC and PsbB were significantly reduced in OE7, while

100 the abundances of the photosystem I (PSI) core proteins PsaA, PsaB, and PsaD were unaltered,

101 implying that the PSI to PSII complex ratio is higher in the OE7 chloroplasts than that in the

102 WT (Supplemental Table S2). The protein abundances of PsbO1 and RbcL (RuBisCO large

103 subunit) were increased by at least 3-fold in the chloroplasts in the OE7 line. The ATP synthase

104 complex subunits were significantly reduced in the OE7 line, including ATPA, ATPB, and

105 ATPC (Supplemental Table S2). In the mitochondria, the protein abundances of the ATP

106 synthase subunits alpha, beta and gamma were also lower in OE7 (Fig. 2B, Supplemental Table

107 S3).

108

109 ***LEF, but not the CEF, was enhanced in the OE lines.*** To investigate the impact of the altered

110 thylakoid composition on the photosynthetic performance, the photosynthetic electron

111 transport in 20-day-old leaves was assessed using chlorophyll fluorescence analysis (Fig. 3).

112 Both AtPAP2 OE lines displayed an increased PSII quantum yield Y(II), PSII photochemical

113 capacity (qP), and electron transport rate (ETR) compared to the WT (Fig. 3A), which suggests

114 that the OE lines exhibited a higher LEF efficiency. No difference in terms of absorptivity was

115 observed between the WT and OE line, implying that the altered photosynthesis parameters in

116 OE line was not due to any changes in chlorophyll absorption capacity (Supplemental Fig. S2).

117 An analysis of the P700 redox state showed that the PSI in the OE lines was highly oxidized

118 under low light conditions ( $25 - 125 \mu\text{mol photon m}^{-2} \text{s}^{-1}$ ), suggesting that in the OE lines, the

119 number of electrons that are captured from the PSI by downstream recipients (e.g.,  $\text{NADP}^+$ ) is

120 higher than the number of electrons that is supplied by PSII to PSI (Fig. 3B). This phenomenon

121 was not observed when the electron flow was larger at the higher light intensities. Although the

122 ETR and P700 redox analysis suggested that the OE lines have a higher electron transfer

123 capacity, the NAD(P)H dehydrogenase- and Fd- dependent CEF were not significantly changed

124 in the OE lines according to the post-illumination chlorophyll fluorescence transient and

125 ruptured chloroplast assay, respectively (Supplemental Fig. S3). In summary, the LEF, but not

126 the CEF, was enhanced in the OE lines, and PSI played a key role in this enhancement by

127 relaying more electrons to NADP<sup>+</sup> in the transfer chain.

128 ***Photosynthesis rate was enhanced in the chloroplasts of the AtPAP2 OE lines.*** To study the  
129 effect of the altered thylakoid composition on the photosynthesis performance, the  
130 photosynthetic parameters were characterized in 20-day-old leaves by an analysis of gas  
131 exchange. Both OE lines exhibited a higher light-saturated-carbon fixation rate under ambient  
132 CO<sub>2</sub> concentration than the WT (Fig. 3C). This increased rate correlates with the higher  
133 abundance of RbcL in the OE chloroplasts (Fig. 2A). Assays of the Calvin-Benson-Bassham  
134 (CBB) cycle enzymes showed that the capacities of fructose biphosphate aldolase and  
135 glyceraldehyde-3-phosphate dehydrogenase (GAPDH) were increased by 30 - 40% in the  
136 chloroplasts in the OE7 line (Table 1).

137 ***The mitochondria in the AtPAP2 OE line had a higher capacity in dissipating reducing***  
138 ***equivalents.*** Reductant equivalents can be exported from the chloroplasts in the form of malate  
139 or DHAP (Shameer et al., 2019), which can be used for sucrose synthesis in the cytosol or  
140 converted to pyruvate and fed into the TCA cycle. Enzyme assays of the TCA cycle suggested  
141 that the OE7 mitochondria had an increased capacity of mitochondrial NAD<sup>+</sup>-dependent malate  
142 dehydrogenase (mMDH) but not in the capacities of pyruvate dehydrogenase, citrate synthase  
143 or aconitase (Table 1), whereas the capacities of chloroplast NADP<sup>+</sup>-dependent malate  
144 dehydrogenase, mMDH, 2-oxoglutarate dehydrogenase (2-OGDH), and succinyl-CoA  
145 synthetase were increased by 1.26-fold, 1.15-fold, 2.86-fold and 10.3-fold in the OE7 line,  
146 respectively. Our recent studies showed that glycine decarboxylase generates a large amount  
147 of NADH in mitochondria during photorespiration, which exceeds the NADH-dissipating  
148 capacity of the mitochondria. Consequently, the surplus NADH must be exported to the cytosol  
149 through the mitochondrial malate-OAA shuttle (Lim et al., 2020). The oxygraph studies  
150 showed that the electron-feeding capacities of complex II and internal NADH dehydrogenase,  
151 but not of complex I or external NADH dehydrogenase, were enhanced in the OE7  
152 mitochondria (Table 2). If the OE line had a higher capacity in dissipating NADH, less surplus  
153 reducing equivalents will be exported to the cytosol through the malate-OAA shuttle.

154

155 ***Higher mitochondrial activity is responsible for the higher cytosolic ATP in the OE line.*** Our  
156 previous study showed that the leaf in the AtPAP2 OE lines contained a significantly higher  
157 level of ATP and a higher ATP/NADPH ratio in both dark and light conditions (Liang et al.,



158 2015). Here, we introduced a FRET MgATP<sup>2-</sup> sensor (Imamura et al., 2009; Voon et al., 2018)  
159 into the chloroplasts and the cytosol and a pH sensor (Schwarzländer et al., 2011) to the  
160 mitochondrial matrix and compared the responses of the OE7 and WT lines (Voon et al., 2018).  
161 Illumination led to an increased ATP concentration in the stroma (Fig. 4A) and alkalization of  
162 the mitochondrial matrix in both lines (Fig. 4B). The extent of the alkalization of the  
163 mitochondrial matrix was greater in the OE7 line than that in the WT, implying that under the  
164 same light intensity, the reducing power harvested by the chloroplasts may lead to a stronger  
165 proton translocation activity across the mitochondrial inner membrane (Fig. 4B). By contrast,  
166 the rate of increase in the ATP concentration in the stroma is lower in the OE7 line than that in  
167 the WT, which is likely due to a higher ATP consumption rate in the OE7 chloroplasts because  
168 the CO<sub>2</sub> fixation rate (Fig. 3C) and the capacities of certain CBB cycle enzymes are higher in  
169 the OE7 line (Table 1). We then examined the contribution of complex I, complex II and  
170 complex V in the OE7 mitochondria to cytosolic ATP. These inhibitors lower the cytosolic ATP  
171 in both lines (Fig. 4C). When complex I was inhibited by rotenone, the cytosolic ATP  
172 concentration was significantly higher in the OE7 line, suggesting that non-complex I activities  
173 in the OE7 mitochondria, such as complex II and internal NADH dehydrogenase, can  
174 compensate more effectively than those in the WT (Table 2). This difference was not observed  
175 when complex II was inhibited by TTFA. After one hour of incubation with oligomycin,  
176 cytosolic ATP in WT dropped to an undetectable level, whereas a higher level of cytosolic ATP  
177 was remained in OE7, suggesting that the intrinsic cytosolic ATP level was higher in OE7 than  
178 WT (Fig. 4C).

179

180 ***AtPAP2 selectively interacts with a number of chloroplast and mitochondrial proteins.*** A  
181 yeast two-hybrid (Y2H) library screening was carried out to identify other AtPAP2-interacting  
182 proteins. Forty nuclear-encoded AtPAP2-interacting proteins were identified; of these proteins,  
183 32 and 3 proteins have been experimentally verified in chloroplasts and mitochondria,  
184 respectively (Supplemental Table S4). The other 5 AtPAP2-interacting proteins were predicted  
185 to be targeted to chloroplasts and/or mitochondria. AtPAP2 is exposed to the cytosolic side of  
186 the outer membrane of both organelles and its role in import of organellar proteins may account  
187 for the enrichment of nuclear-encoded organellar proteins. A systematic Y2H assay was then  
188 carried out to examine the interactions between AtPAP2 and various nucleus-encoded  
189 photosystem proteins (Supplemental Fig. S4A). AtPAP2 could specifically interact with Fd1,  
190 Fd2, PsaE2 (but not PsaE1), ferredoxin/thioredoxin reductase subunit A2 (FTRA2) (but not

191 FTRA1), FTRB, and photosynthetic NDH subcomplexes L1, L2, and L3 (PsbQ-like1, PsbQ-  
192 like2, and PsbQ-like3). These interactions were verified by *in vivo* bimolecular fluorescence  
193 complementation (BiFC) assays (Supplemental Fig. S4B and Supplemental Fig. S5). Hence,  
194 AtPAP2 may play a role in the import of these precursor proteins, particularly the proteins at  
195 the acceptor side of PSI, into chloroplasts.

196



## 197 Discussion

198 Maintenance of optimal photosynthetic efficiency requires the production and  
199 consumption of ATP and reductants in chloroplasts at appropriate ratios. Our recent study  
200 showed that the import of cytosolic ATP into mature chloroplasts of *Arabidopsis thaliana* is  
201 negligible and therefore could not supply additional ATP to the CBB cycle (Voon et al., 2018).  
202 Hence, the export of surplus reducing equivalents to extrachloroplast compartments is essential  
203 for balancing the ATP/NADPH ratio (Voon and Lim, 2019). Under illumination, the chloroplast  
204 is the producer of reducing equivalents and ATP, and the mitochondria consume the excess  
205 reducing equivalents to supply ATP to the cytosol (Gardeström and Igamberdiev, 2016;  
206 Shameer et al., 2019; Voon et al., 2018). The results presented here provide an example on how  
207 chloroplast function is highly dependent on the mitochondria. Illumination greatly elevates the  
208 amount of NADPH and the NADPH/ATP ratio in WT leaves (Liang et al., 2016), which  
209 represents a high reduction state in plant cells. Our previous studies showed that in the middle-  
210 of-day, the leaf sucrose and ATP contents are higher in the OE lines than those in the WT line  
211 in 20-day-old plants, whereas the leaf NADPH contents, NADPH/NADP<sup>+</sup> and NADPH/ATP  
212 ratios are lower in the OE lines than that in the WT line (Liang et al., 2015). Here, our data  
213 (Fig. 4, tables 1 and 2) indicated that the OE mitochondria may have a higher capacity to  
214 consume extra reducing equivalents to generate ATP (Fig. 5). This mechanism could account  
215 for the high ATP, high sucrose, but low NADPH content in the leaves of the OE lines in the  
216 middle-of-day (Liang et al., 2015; Sun et al., 2012b). In addition, the RuBisCO content (Fig.  
217 2A) and the capacities of the CBB cycle enzymes FBA and GAPDH (Table 1) were higher in  
218 the OE chloroplasts. These could lead to a higher rate of CO<sub>2</sub> fixation (Fig. 3C) and a rapid  
219 recycling of ADP, NADP<sup>+</sup> and RuBP in the stroma. Hence, a faster recycling of ribulose-1,5-  
220 biphosphate (RuBP) and an enhanced output of dihydroxyacetone phosphate (DHAP) from  
221 the OE chloroplasts could be achieved. This, together with a higher consumption rate of  
222 reductants by the mitochondria (Table 2), might cause a lower reduction state in the stroma,  
223 thereby leading to an enhancement of the LEF in the OE lines. This hypothesis is supported by  
224 our data from the P700 redox analysis (Fig. 3B). At low light conditions (25 – 125 μmol photon  
225 m<sup>-2</sup> s<sup>-1</sup>), in which the electron flow is smaller, PSI in the OE lines was highly oxidized, which  
226 was likely due to a high demand of electrons for the NADP<sup>+</sup> reduction or a higher PSI/PSII  
227 ratio (Fig. 2A and Supplemental Table S2). This oxidized state was relieved under higher light  
228 conditions (>125 μmol photon m<sup>-2</sup> s<sup>-1</sup>) when the electron flow was larger (Fig. 3B).

229 In pea (*Pisum sativum*), the PSI/PSII ratios were adjusted under different light conditions  
230 as follows: sunlight-grown, 0.55; yellow light (preferentially excites PSII), 0.40; and red light  
231 (preferentially excites PSI), 0.91 (Chow et al., 1990). Compared to plants with a lower PSI/PSII  
232 ratio, plants with a higher PSI/PSII exhibit a higher rate of oxygen evolution under illumination  
233 intensities that exceed 200  $\mu\text{mol photon m}^{-2} \text{ s}^{-1}$  (Chow et al., 1990). We also observed a higher  
234 PSI/PSII ratio in the OE chloroplasts than that in the WT chloroplasts in the 2D-DIGE analysis  
235 (Fig. 2A and Supplemental Table S2). The OE lines exhibited a higher ETR than the WT when  
236 the light intensity exceeded 200  $\mu\text{mol photon m}^{-2} \text{ s}^{-1}$  (Fig. 3). A higher PSI/PSII ratio allows  
237 for a faster throughput of electrons from the photosynthetic ETC via the PSI acceptor side and  
238 results in a lower possibility of an over-reduction in ETC (Tikkanen et al., 2014). Interestingly,  
239 the OE lines had also less stacked thylakoid membranes compared to the WT (Fig. 1). It is  
240 likely that the loose stacking increases the share of the grana margin domain that is composed  
241 of all components of the photosynthetic electron transfer chain in relation to the PSII-enriched  
242 grana stacks and PSI-enriched stroma lamellae. The importance of grana stacking for  
243 photosynthetic efficiency is not understood. Based on the results presented here, the loose  
244 stacking may be essential for the efficient interactions among the components of the  
245 photosynthetic electron transfer chain.

246 Consistently with this hypothesis, the analysis of the P700 (PSI reaction centre) redox  
247 state revealed that the P700 in the OE lines was relatively oxidized compared to that in the WT  
248 when the electron supply from PSII was limited (25 – 125  $\mu\text{mol photon m}^{-2} \text{ s}^{-1}$ ) (Fig. 3B). Y2H  
249 showed that AtPAP2 preferably interacts with the downstream components of PSI, including  
250 PsaE2, Fd1, Fd2, FTRA2 and FTRB (Supplemental Fig. 4). Altogether, we hypothesize that  
251 the LEF rate in the OE lines was increased because of the higher capacity of electron transfer  
252 in PSI. LEF generates 1.28 mole ATP per mole of NADPH, but a minimum of 1.5 mole of ATP  
253 per mole of NADPH is required for carbon fixation (Allen, 2003; Foyer et al., 2012). It is  
254 generally believed that CEF pathways are needed to supplement ATP and modulate the  
255 ATP/NADPH ratio to meet the demand of metabolism (Foyer et al., 2012; Ishikawa et al., 2016).  
256 However, our studies showed that an enhancement of CEF is not required to support a more  
257 robust CBB cycle in the OE line (Supplemental Fig. S3). A recent study in diatom showed that  
258 the ATP generated from mitochondria can be transported to chloroplasts for carbon fixation  
259 (Bailleul et al., 2015), and it was believed that this also occurs in higher plants. However, our  
260 recent study showed that in the mesophyll of *Arabidopsis thaliana*, cytosolic ATP does not  
261 enter mature chloroplast to support carbon fixation (Voon et al., 2018). Altogether, because the

262 NADPH/ATP demand for carbon dioxide fixation is approximately 0.67, and a 0.77 molecule  
263 of NADPH is generated from each ATP molecule in LEF (Allen, 2003; Foyer et al., 2012), one  
264 could expect that a surplus reducing power is generated from LEF under illumination. Other  
265 metabolisms in chloroplasts, such as transcription and translation, also consume ATP molecules;  
266 therefore, the surplus of reducing equivalents would be more evident. The surplus of reducing  
267 equivalents must be exported and dissipated to recycle  $\text{NADP}^+$  for efficient photosynthesis.

268 The reducing power generated from LEF can be exported as DHAP and malate (Fig. 5)  
269 (Noctor and Foyer, 2000; Scheibe, 2004). While modelling predicted that only 5% or less of  
270 the reducing equivalents from LEF can be exported through the malate-OAA shuttle (Fridlyand  
271 et al., 1998), the higher capacity of the  $\text{NAD}^+$ -MDH in the OE line might allow for the export  
272 of more reducing equivalents from the mitochondria to the cytosol through the malate-OAA  
273 shuttle. Illumination promotes the association between mitochondria and chloroplasts and  
274 peroxisomes (Oikawa et al., 2015), and, therefore, the malate-OAA shuttle can be a very  
275 efficient energy and reductant transfer pathway between the chloroplasts, mitochondria and  
276 peroxisomes. Malate and OAA in the stroma and cytosol were estimated to have concentrations  
277 ranging from 1 – 3 mM and 0.025-0.098 mM, respectively (Heineke et al., 1991). This  
278 concentration ratio is maintained by the large positive value of free energy change,  $\Delta_f G$ , of  
279 malate dehydrogenation. This equilibrium can drive malate synthesis in the chloroplasts upon  
280 illumination because the chloroplast  $\text{NADP}^+$ -dependent malate dehydrogenase is activated by  
281 light (Scheibe, 1987; Zhao et al., 2018). The reducing power, thus, can be readily channelled  
282 to the peroxisomes for hydroxypyruvate reduction through the malate-OAA shuttle. As more  
283 reductants are consumed by the more active OE mitochondria, less exportation of reductants  
284 from mitochondria is expected. Hence, more reductants from the chloroplasts can be dissipated  
285 indirectly (Fig. 5). This is in line with our recent observation that the increase in stromal  
286 NADPH during illumination disappeared when photorespiration was absent (Abdel-Ghany,  
287 2009; Lim et al., 2020).

288 In summary, the overexpression of AtPAP2 modulates the import of selected nucleus-  
289 encoded proteins into chloroplasts (Zhang et al., 2016) and mitochondria (Law et al., 2015),  
290 which leads to stronger sinks of reductants, including higher activities in the CBB cycle and  
291 mitochondrial ETC, in both organelles. A higher output of reducing equivalents from the LEF  
292 of chloroplasts (Fig. 3) and higher mitochondrial activities in utilizing the reducing equivalents  
293 for ATP production, thus, contribute to the higher ATP content and ATP/NADPH ratio in the  
294 OE lines (Liang et al., 2015). The simultaneous activation of chloroplasts and mitochondria is

295 required for the production of a surplus of ATP and sucrose; the transgenic lines that  
296 overexpress AtPAP2 solely in the chloroplasts grew similarly to the WT (unpublished data),  
297 and the transgenic lines that overexpress AtPAP2 solely in the mitochondria exhibited early  
298 senescence and a lower seed yield (Law et al., 2015). These results provide an example of how  
299 the efficient cooperation of chloroplasts and mitochondria can enhance ATP and sucrose  
300 production in leaf cells. While AtPAP2 can enhance yield and growth in *Arabidopsis thaliana*,  
301 it has negative impacts to plant survival. The OE lines are less resistant to drought and to *P.*  
302 *syringae* infection (Zhang et al., 2017). Therefore, while AtPAP2-like genes were evolved from  
303 green algae during evolution (Sun et al., 2012b), it may not be fully used by higher plants to  
304 promote growth in natural environment, as survival is more important than high yield. It may  
305 be more 'useful' for unicellular algae as water is never a constraint, and algae need to control  
306 their growth rate and carbon level subject to the availability of P/N/Fe.

307 Over the past few decades, a controversy has emerged in the field regarding whether the  
308 shortfall of ATP for the CBB cycle is fulfilled by the CEF or the import of ATP from the cytosol.  
309 Combining the findings of our recent study (Voon et al., 2018) and this study, we concluded  
310 that the efficient carbon fixation in the OE line is not dependent on an enhanced CEF or the  
311 import of ATP from the cytosol to fulfil the shortfall of ATP generated from the LEF. Instead,  
312 an efficient carbon fixation is dependent on an enhanced LEF, enhanced capacities of CBB  
313 enzymes, the efficient export of surplus reducing equivalents from chloroplasts through the  
314 malate-OAA shuttle and a higher reductant-dissipating activity of mitochondria. The ability of  
315 mitochondria to dissipate reducing equivalents is important for relieving the built-up of surplus  
316 reducing power in the stroma, which, in excess, will limit the LEF due to an insufficient supply  
317 of NADP<sup>+</sup>, the major electron acceptor of the LEF. Our recent studies showed that the reducing  
318 equivalents from photorespiration are the major fuel for mitochondria in *Arabidopsis thaliana*  
319 (Lim et al., 2020). The optimal use of reducing equivalents by mitochondria not only generates  
320 more ATP for sucrose synthesis, but also reduces the export of reducing equivalents from the  
321 mitochondria and therefore the overall redox status of the photosynthetic cells. This provides  
322 a good example to illustrate the relationship between chloroplasts and mitochondria in  
323 bioenergetics.

324

## 325 **Methodology**

326 **Plant growth conditions.** The WT *Arabidopsis thaliana* ecotype Columbia-o (WT), the  
327 *Arabidopsis thaliana* AtPAP2-overexpressing lines (OE7, OE21) and the *pap2* T-DNA  
328 insertion mutant (Salk\_013567) (Sun et al., 2012b) were used in this study. *Arabidopsis* seeds  
329 were plated for 10 days on Murashige and Skoog (MS) medium, which was supplemented with  
330 2% (w/v) sucrose. Seedlings of similar sizes were transferred to soil under growth chamber  
331 conditions (120-150  $\mu\text{mol m}^{-2} \text{s}^{-1}$ , 16-h photoperiod, 22 °C).

332

333 **Transmission electron microscopy (TEM).** Plant materials (5th to 7th true leaves of 19-day-  
334 old plants at the beginning of the light period) were fixed with 2.5% (v/v) glutaraldehyde in 75  
335 mM sodium cacodylate and 2 mM  $\text{MgCl}_2$ , pH 7.0, for 1 hour at 25 °C and post-fixed for 2  
336 hours with 1% (w/v) osmium tetroxide in a fixative buffer at 25 °C. After two washing steps  
337 with distilled water, the pieces were dehydrated and then embedded in Spurr's low-viscosity  
338 resin. Ultrathin sections of 50–70 nm were cut with a diamond knife. The sections were post-  
339 stained with aqueous uranyl acetate/lead citrate. The TEM examination was performed under  
340 a Hitachi H-7650 transmission electron microscope with a charge-coupled device camera  
341 (Hitachi High-Technologies, Japan) operating at 80 kV.

342

343 **Determination of the chlorophyll content using an HPLC analysis.** Leaves (30-50 mg) were  
344 freeze-dried and extracted 3 times using 100% acetone (500  $\mu\text{l}$ , 250  $\mu\text{l}$  and 250  $\mu\text{l}$ ). The mixture  
345 was combined and centrifuged twice to eliminate the insoluble substances prior to the HPLC  
346 analysis. The pigment extract was separated and analysed (20  $\mu\text{L}$  aliquots) on a Waters  
347 Spherisorb 5  $\mu\text{m}$  ODS2 (4.6  $\times$  250 mm) analytical column (Waters, USA) at room temperature.  
348 The fluids were eluted at a flow rate of 1.2  $\text{ml min}^{-1}$  with a linear gradient from 100% solvent  
349 A [acetonitrile/methanol/0.1 M TRIS-HCl (pH 8.0), 84:2:14, v/v/v] to 100% solvent B  
350 (methanol/ethyl acetate, 68:32, v/v) over a 15-min period, followed by 10 min of 100% solvent  
351 B. The tridimensional chromatogram was recorded from 250 to 700 nm. The chromatographic  
352 peaks were identified by comparing the retention times and spectra to known standards  
353 provided by Sigma (USA) and Wako (Japan). The pigments were finally quantified by  
354 integrating the peak areas and converting them to concentrations according to the comparisons.  
355 The amounts of lutein,  $\beta$ -carotene, violaxanthin, chlorophyll a (Ca) and chlorophyll b (Cb)  
356 were calculated as follows: lutein:  $Y = 2.56 \times 10^8 X - 153665$ ,  $R = 0.99577$ ,  $p < 0.0001$ ;  $\beta$ -

357 carotene:  $Y = 6.57 \times 10^8 X - 61818$ ; violaxanthin:  $Y = 2.68 \times 10^8 X + 236.6$ ; Chl a:  $Y = 3.30$   
358  $\times 10^7 X + 38832$ ; and Chl b:  $Y = 7.31 \times 10^7 X + 29646$ .  $Y = \text{area}$ ,  $X = \text{mg/ml}$ .

359

360 **2D Blue Native PAGE DIGE.** Leaves from 20-day-old soil-grown WT and OE7 plants at the  
361 middle of the day ( $T = 8$ ) were used as the starting materials. The chloroplast (Lamkemeyer et  
362 al., 2006) and mitochondria isolation (Lee et al., 2008) were performed as previously described.  
363 Cy Dye labelling of the chloroplast or mitochondrial proteins was carried out as previously  
364 described with modifications (Heinemeyer et al., 2009). In total, 100  $\mu\text{g}$   
365 chloroplast/mitochondrial proteins were centrifuged for 10 min at 4 °C at 1000 g using an  
366 Eppendorf centrifuge. The sedimented chloroplasts or mitochondria were re-suspended in a 10  
367  $\mu\text{l}$  solubilization buffer containing 30 mM HEPES, pH 7.4, 150 mM potassium acetate, 10%  
368 [v/v] glycerol, supplemented with 2% [w/v] beta-dodecyl maltoside (chloroplasts) or 5% [w/v]  
369 digitonin (mitochondria). The solubilized proteins were centrifuged for 20 min at 4 °C at full  
370 speed to remove the insoluble material. The supernatant containing the solubilized protein  
371 complexes was supplemented with 10  $\mu\text{l}$  of the solubilization buffer containing 30 mM HEPES,  
372 pH 10, 150 mM potassium acetate, 10% [v/v] glycerol to adjust the pH value of the protein  
373 solution to approximately 8.5, which is a prerequisite for efficient labelling. Cy2, Cy3 and Cy5  
374 NHS ester minimal dyes (Lumiprobe Corporation, USA) were reconstituted into 400 pmol/ $\mu\text{l}$   
375 in DMF according to the manufacturer's instructions, and 2  $\mu\text{l}$  of the Cy dye were added to the  
376 solubilized chloroplast or mitochondrial proteins. The WT was labelled using a Cy3 dye, and  
377 the OE was labelled with the Cy5 dye, while the internal standard (consisting of a pooled  
378 sample comprising an equal amount of all samples in the experiment) was labelled with Cy2.  
379 The labelling occurred for 30 min in the dark on ice and was stopped by adding 1  $\mu\text{l}$  of a Lysine  
380 solution (10 mM). Finally, the sample was supplemented with 3  $\mu\text{l}$  5% (w/v) Serva Blue G  
381 (750 mM aminocaproic acid, 5% [w/v] Coomassie 250 G) and directly transferred into the slot  
382 of a blue native gel. The solubilized proteins were separated by two-dimensional Blue  
383 native/SDS PAGE as described previously by Wittig et al. (2006). The image acquisition was  
384 performed with a Typhoon Scanner, and the quantification of the Cy Dye labelled proteins  
385 resolved by the 2D Blue native PAGE was carried out using the SAMESPOTS software  
386 (TotalLab, Tyne, England) based on the gel-images acquired from 3 biological replicates.

387

388 **Chlorophyll *a* fluorescence measurement.** The chlorophyll *a* fluorescence levels of the  
389 *Arabidopsis* leaves (20 days old) were monitored with IMAGING-PAM M-Series Maxi



390 Version (WALZ, Germany). The plants were dark-adapted for at least 1 hour before the  
391 measurements. After the maximum and initial fluorescence ( $F_m$  and  $F_0$ , respectively) were  
392 determined with a delay of 40 s, the plants were illuminated using the following light intensities:  
393 0, 81, 145, 186, 281, 335, 461, 701, and 926  $\mu\text{mol photon m}^{-2} \text{ s}^{-1}$ . The duration of the  
394 illumination of each light intensity was 3 min. A saturation pulse (800 ms, 2700  $\mu\text{mol photon}$   
395  $\text{m}^{-2} \text{ s}^{-1}$ ) was applied at the end of the 3-min illumination. For each light intensity, the  
396 photosynthesis parameters were calculated using the formulas:  $Y(\text{II})$  was calculated as  $(F_m' -$   
397  $F) / F_m'$ ;  $qP$  is calculated as  $(F_m' - F) / (F_m' - F_0')$ ;  $\text{NPQ}$  was calculated as  $(F_m - F_m') / F_m'$ ;  
398  $\text{ETR}$  was calculated as  $Y(\text{II}) \times \text{light intensity} \times 0.5 \times \text{absorptivity}$ .  $F_m'$  is the maximal  
399 fluorescence of light-illuminated plant.  $F$  is the current fluorescence yield.  $F_0'$  was estimated  
400 by  $F_0 / (F_v / F_m + F_0 / F_m')$  (Oxborough and Baker, 1997).

401

402 **Measurements of  $\text{CO}_2$  assimilation.** The carbon dioxide assimilation in the 20-day-old plants  
403 was measured using the portable photosynthesis system LI-6400XT (LiCor, USA) and whole  
404 plant *Arabidopsis* chamber 6400-17. The plants were cultivated hydroponically in four- times  
405 diluted Hoagland nutrient solution (plants were fixed in “Grodan”-mineral wool cubes) under  
406 growth chamber conditions (irradiation 120-150  $\mu\text{mol m}^{-2} \text{ s}^{-1}$ , 16/8 h day/night photoperiod,  
407 temperature 22°C). The plants were transferred immediately before the measurement into  
408 conical pots dedicated to the 6400-17 chamber, and the boundary between the substrate (roots)  
409 and rosette was established using aluminium foil to minimize non-leaves transpiration. The  
410 light response of  $\text{CO}_2$  assimilation was measured under ambient  $\text{CO}_2$  concentration 400  $\mu\text{mol}$   
411  $\text{mol}^{-1}$  and PAR levels 2000, 1000, 500, 250, 120, 60, 30, 15 and 0  $\mu\text{mol photon m}^{-2} \text{ s}^{-1}$ . Stable  
412 temperature at 25 °C and the relative air humidity between 50 and 70% were kept in the  
413 chamber during measurement.

414

415 **Measurements of the post-illumination chlorophyll fluorescence transient.** The modulated  
416 chlorophyll fluorescence was measured using a PAM 101 fluorometer (H. Walz, Germany).  
417 Before the minimal fluorescence ( $F_0$ ) determination, the leaves were kept in darkness for at  
418 least 1 hour. The  $F_0$  was induced by a red-modulated measuring light with a photon flux density  
419 (PFD) of approx. 0.2  $\mu\text{mol photon m}^{-2} \text{ s}^{-1}$ . The post-illumination Chl fluorescence increase is  
420 attributed to the back flow of electrons to the PQ pool from NADPH in the stroma via the cyclic  
421 electron flow around photosystem I (CEF-PSI), which depends on the NDH complex (Gotoh  
422 et al., 2010).



423

424 **Ruptured chloroplast assay.** The cyclic electron flow was measured in ruptured chloroplasts  
425 through an Fd-dependent plastoquinone reduction as previously described (Endo et al., 1998;  
426 Munekage et al., 2002). Briefly, the isolated chloroplasts (10 µg Chl) were osmotically ruptured  
427 in the analysis buffer (7 mM MgCl<sub>2</sub>, 1 mM MnCl<sub>2</sub>, 2 mM EDTA, 30 mM KCl, 0.25 mM  
428 KH<sub>2</sub>PO<sub>4</sub>, and 50 mM HEPES, pH 7.6) for 10 min prior to the analysis. One min after the  
429 initiation of the measurement, NADPH (Roche, Basel, Switzerland) was added to a final  
430 concentration of 0.25 mM. Maize ferredoxin (Sigma Aldrich, St. Louis, MO, USA) was added  
431 after an additional 30 s.

432

433 **Enzyme assays of the Calvin-Benson-Bassham cycle and TCA cycle.** The chloroplast  
434 proteins were used to assay the fructose 1,6-bisphosphate aldolase (Schaeffer et al., 1997) and  
435 NADP<sup>+</sup>-glyceraldehyde-3-phosphate dehydrogenase activities. Enzyme assays of the TCA  
436 cycle were performed as described previously (Huang et al., 2015). The activity of the  
437 mitochondrial proteins (1-25 µg protein) were assayed spectrophotometrically using a  
438 Multiskan™ GO Microplate Spectrophotometer (Thermo Scientific, USA).

439

440 **Measurements of oxygen consumption.** A Clark-type oxygen electrode (Hansatech  
441 Instrument, UK) was used to measure oxygen consumption. The respiration rate of isolated  
442 mitochondria was measured at 25 °C in a chamber containing 1 ml of the respiration buffer  
443 (0.3 M Suc, 5 mM KH<sub>2</sub>PO<sub>4</sub>, 10 mM TES, 10 mM NaCl, 2 mM MgSO<sub>4</sub>, and 0.1% [w/v] BSA,  
444 pH 6.8 or pH 7.2). The capacity of complex I, internal and external NADH dehydrogenases,  
445 and complex II were measured in the presence of deamino-NADH (1 mM), malate (10 mM),  
446 glutamate (10 mM), and NADH (1 mM) with or without ADP (100 µM) and/or rotenone (5  
447 µM) as previously described (Jacoby et al., 2015; Meyer et al., 2009).

448

449 **FRET-based ATP sensor and pH-dependent fluorescent probe.** In the ATP sensor AT1.03,  
450 an ATP-binding epsilon-subunit of *Bacillus subtilis* F<sub>0</sub>F<sub>1</sub>-ATP synthase was fused between  
451 mseCFP and mVenus (Imamura et al., 2009). The binding of ATP changes the distance between  
452 mseCFP and mVenus and modulates the FRET signal (Imamura et al., 2009). The use of this  
453 sensor in plant systems was recently verified, and the chlorophyll fluorescence does not  
454 interfere with the FRET ratio in chloroplasts (Voon et al., 2018). To exclude the intensity  
455 contributed from sources other than the FRET signal, correction coefficients for bleed-through

456 and cross-excitation were determined separately in different plant compartments (Broussard et  
457 al., 2013). Sensitized FRET was used in all subsequent measurements involved AT1.03. To  
458 estimate the ATP concentration *in vivo*, sensitized FRET/ CFP ratios of purified recombinant  
459 AT1.03 sensor (6  $\mu$ M) were calibrated with increasing ATP concentrations (0 – 6 mM) as  
460 previously described (Voon et al., 2018). A pH-dependent fluorescent probe with circularly  
461 permuted yellow fluorescent protein (cpYFP) was introduced into the matrix of the  
462 mitochondria (Nagai et al., 2001). cpYFP has a bimodal absorption spectrum with two peak  
463 maxima, 395 and 475 nm, and a single emission peak at 528 nm (Nagai et al., 2001). The  
464 absorption intensity of these two spectra is dependent on whether the chromophore of cpYFP  
465 is protonated or deprotonated. Protonated cpYFP displays a higher absorption at 395 nm, which  
466 emits a higher signal at 528 nm if excited at 395 nm. cpYFP was shown to respond specifically  
467 to the pH value (Schwarzländer et al., 2011).

468

469 **Yeast two-hybrid assay.** A normalized yeast two-hybrid (Y2H) library was prepared from  
470 mRNAs that were isolated from eleven *Arabidopsis* tissues and was employed for the screening  
471 (Clontech Laboratories, Japan). The coding sequence of the mature bait protein AtPAP2 (25-  
472 613 a.a.), which lacks its signal peptide and C-terminal transmembrane motif, was fused to the  
473 C-terminus of the GAL4 DNA-binding domain (BD) in the pGBKT7 vector. The GAL4-based  
474 Y2H library screening was performed using the Matchmaker Gold Yeast Two-Hybrid System  
475 following the manufacturer's instructions (Clontech Laboratories, Japan). The mated culture  
476 was concentrated by centrifugation and spread onto agar plates (90 mm) containing triple  
477 dropout medium without Leu, Trp and His (TDO). Putative positive colonies (> 2 mm) were  
478 cultured on TDO liquid medium, and pGADT7 plasmids were extracted from the yeast cells  
479 for the *E. coli* transformation. The plasmids (pGADT7-prey) were re-extracted and sequenced.  
480 To identify the interactions between AtPAP2 and various components of the photosynthetic  
481 apparatus, the coding sequences of prey proteins were amplified from *Arabidopsis* leaf cDNA  
482 by Platinum<sup>TM</sup> Pfx polymerase (Thermo Scientific, USA) and fused downstream of the DNA-  
483 activating domain (AD) in the pGADT7 vector. The Y2HGold yeast cells were co-transformed  
484 with both the bait and prey protein constructs using the lithium acetate method and plated onto  
485 double dropout without Leu and Trp (DDO), TDO, and quadruple dropout without Ade, His,  
486 Leu and Trp (QDO) agar plates (Clontech Laboratories, Japan).

487

488 **Bimolecular fluorescence complementation (BiFC).** The full-length coding sequence of the

489 bait protein AtPAP2 was fused to the C-terminus of YFP<sup>C</sup> in the pSPYCE vector, while the  
490 coding sequences of the photosynthetic apparatus subunits were fused to the N-terminus of the  
491 pSPYNE containing YFP<sup>N</sup> (Kerppola, 2006). Both the prey and bait plasmids were transformed  
492 into the *Agrobacterium tumefaciens* strain GV3101, and the bacteria were infiltrated into the  
493 epidermal cell layers of tobacco leaves as previously described (Schweiger and Schwenkert,  
494 2014). The transfected regions of the leaves were used for fluorescence detection after a 48-  
495 hour incubation in the dark under an LSM710 confocal laser scanning microscope (Zeiss). The  
496 primers that were used in this study are listed in Supplemental Table S5.

### 497 **Acknowledgements**

498 This project was supported by the Seed Funding Program for Basic Research (201311159043)  
499 of the University of Hong Kong, the General Research Fund (772012M) and the Area of  
500 Excellence Scheme (AoE/M-403/16) of the Hong Kong Research Grants Council, the  
501 Innovation and Technology Fund (Funding Support to State Key Laboratories in Hong Kong)  
502 of the HKSAR, China. Access to LI-6400 was supported by the Czech research infrastructure  
503 for systems biology C4SYS (project no LM2015055). We thank Prof. Wah Soon Chow and  
504 Dr. Maurice Cheung for their comments on this manuscript. We thank Dr. Huang Shaobai and  
505 Dr. Richard Jacoby for training of YL in enzyme assays, oxygraph and 2D-DIGE. We thank  
506 Prof. Hans-Peter Braun and Dr. Holger Eubel for technical advice in the 2D BN/SDS-PAGE  
507 DIGE analysis.

508

### 509 **Authors' contributions**

510 CPV, YL, and BLL wrote the manuscript with PG's input. CPV produced some of the  
511 transgenic sensor lines, performed the fluorescent sensor measurements, carried out the Maxi-  
512 Pam measurements and 2D BN-PAGE of the chloroplasts. YL carried out the 2D BN-PAGE of  
513 the mitochondria, the enzyme assays with WC, and the oxygraph assays with ZX. XG screened  
514 the yeast two-hybrid library and carried out the BiFC. RZ and FS produced the overexpression  
515 lines. FS measured the chlorophyll content. ML, MP and DL carried out the chloroplast rupture  
516 assay, MTik carried out the P700 assay, and MTsu carried out the post-illumination chlorophyll  
517 fluorescence. JK and MH carried out the CO<sub>2</sub> exchange measurements. YC and LJ carried out  
518 the TEM analysis. BLL coordinated this study. All authors read and approved the manuscript.

### 519 **Competing financial interests.**

520 AtPAP2 is the subject of US patent number 9,476,058.

521 **Supporting Information**

522 Supplemental Figure S1. The OE lines grew faster under both SD (8h/16h) and LD (16h/8h)  
523 conditions.

524 Supplemental Figure S2. Leaf absorptivity is similar between WT line and AtPAP2  
525 overexpression line (OE7).

526 Supplemental Figure S3. *In vivo* analysis of the cyclic electron flow rate.

527 Supplemental Figure S4. AtPAP2 selectively interacts with certain photosystem proteins.

528 Supplemental Figure S5. Results of BiFC negative controls.

529 Supplemental Table S1. Photosynthetic pigment content.

530 Supplemental Table S2. Chloroplast proteins identified in 2D BN PAGE.

531 Supplemental Table S3. Summary of identified mitochondrial protein spots.

532 Supplemental Table S4. AtPAP2-interacting proteins identified by Y2H library screening.

533 Supplemental Table S5. Primer list.

534

535 **References**

536 Abdel-Ghany, S.E. (2009) Contribution of plastocyanin isoforms to photosynthesis and  
537 copper homeostasis in *Arabidopsis thaliana* grown at different copper regimes. *Planta* **229**,  
538 767-779.

539 Allen, J.F. (2003) Cyclic, pseudocyclic and noncyclic photophosphorylation: new links in  
540 the chain. *Trends in plant science* **8**, 15-19.

541 Armbruster, U., Labs, M., Pribil, M., Viola, S., Xu, W., Scharfenberg, M., Hertle, A.P.,  
542 Rojahn, U., Jensen, P.E., Rappaport, F., Joliot, P., Dormann, P., Wanner, G. and Leister, D.  
543 (2013) *Arabidopsis* CURVATURE THYLAKOID1 proteins modify thylakoid architecture by  
544 inducing membrane curvature. *Plant Cell* **25**, 2661-2678.

545 Bailleul, B., Berne, N., Murik, O., Petroutsos, D., Prihoda, J., Tanaka, A., Villanova, V.,  
546 Bligny, R., Flori, S., Falconet, D., Krieger-Liszak, A., Santabarbara, S., Rappaport, F., Joliot,  
547 P., Tirichine, L., Falkowski, P.G., Cardol, P., Bowler, C. and Finazzi, G. (2015) Energetic  
548 coupling between plastids and mitochondria drives CO<sub>2</sub> assimilation in diatoms. *Nature* **524**,  
549 366-369.

550 Broussard, J.A., Rappaz, B., Webb, D.J. and Brown, C.M. (2013) Fluorescence resonance  
551 energy transfer microscopy as demonstrated by measuring the activation of the serine/threonine  
552 kinase Akt. *Nat Protoc* **8**, 265-281.

553 Chow, W.S., Melis, A. and Anderson, J.M. (1990) Adjustments of Photosystem  
554 Stoichiometry in Chloroplasts Improve the Quantum Efficiency of Photosynthesis. *Proc Natl*  
555 *Acad Sci U S A* **87**, 7502-7506.

556 Dutilleul, C., Driscoll, S., Cornic, G., De Paepe, R., Foyer, C.H. and Noctor, G. (2003)  
557 Functional mitochondrial complex I is required by tobacco leaves for optimal photosynthetic  
558 performance in photorespiratory conditions and during transients. *Plant Physiol* **131**, 264-275.

559 Endo, T., Shikanai, T., Sato, F. and Asada, K. (1998) NAD(P)H dehydrogenase-dependent,  
560 antimycin A-sensitive electron donation to plastoquinone in tobacco chloroplasts. *Plant and*  
561 *Cell Physiology* **39**, 1226-1231.

562 Foyer, C.H., Neukermans, J., Queval, G., Noctor, G. and Harbinson, J. (2012)  
563 Photosynthetic control of electron transport and the regulation of gene expression. *J Exp Bot*  
564 **63**, 1637-1661.

565 Fridlyand, L.E., Backhausen, J.E. and Scheibe, R. (1998) Flux control of the malate valve  
566 in leaf cells. *Arch Biochem Biophys* **349**, 290-298.

567 Gardeström, P. and Igamberdiev, A.U. (2016) The origin of cytosolic ATP in  
568 photosynthetic cells. *Physiol Plantarum* **157**, 367-379.

569 Gerhardt, R., Stitt, M. and Heldt, H.W. (1987) Subcellular Metabolite Levels in Spinach  
570 Leaves : Regulation of Sucrose Synthesis during Diurnal Alterations in Photosynthetic  
571 Partitioning. *Plant Physiol* **83**, 399-407.

572 Gotoh, E., Matsumoto, M., Ogawa, K., Kobayashi, Y. and Tsuyama, M. (2010) A

573 qualitative analysis of the regulation of cyclic electron flow around photosystem I from the  
574 post-illumination chlorophyll fluorescence transient in Arabidopsis: a new platform for the in  
575 vivo investigation of the chloroplast redox state. *Photosynthesis research* **103**, 111-123.

576 Heineke, D., Riens, B., Grosse, H., Hoferichter, P., Peter, U., Flugge, U.I. and Heldt, H.W.  
577 (1991) Redox transfer across the inner chloroplast envelope membrane. *Plant Physiol* **95**, 1131-  
578 1137.

579 Heinemeyer, J., Scheibe, B., Schmitz, U.K. and Braun, H.P. (2009) Blue native DIGE as  
580 a tool for comparative analyses of protein complexes. *J Proteomics* **72**, 539-544.

581 Huang, S., Lee, C.P. and Millar, A.H. (2015) Activity assay for plant mitochondrial  
582 enzymes. *Methods Mol Biol* **1305**, 139-149.

583 Imamura, H., Nhat, K.P., Togawa, H., Saito, K., Iino, R., Kato-Yamada, Y., Nagai, T. and  
584 Noji, H. (2009) Visualization of ATP levels inside single living cells with fluorescence  
585 resonance energy transfer-based genetically encoded indicators. *Proc Natl Acad Sci U S A* **106**,  
586 15651-15656.

587 Ishikawa, N., Takabayashi, A., Sato, F. and Endo, T. (2016) Accumulation of the  
588 components of cyclic electron flow around photosystem I in C4 plants, with respect to the  
589 requirements for ATP. *Photosynthesis research* **129**, 261-277.

590 Jacoby, R.P., Millar, A.H. and Taylor, N.L. (2015) Assessment of Respiration in Isolated  
591 Plant Mitochondria Using Clark-Type Electrodes. In: *Plant Mitochondria: Methods and*  
592 *Protocols* (Whelan, J. and Murcha, M.W. eds), pp. 165-185. New York, NY: Springer New  
593 York.

594 Kerppola, T.K. (2006) Design and implementation of bimolecular fluorescence  
595 complementation (BiFC) assays for the visualization of protein interactions in living cells.  
596 *Nature Protocols* **1**, 1278-1286.

597 Lamkemeyer, P., Laxa, M., Collin, V., Li, W., Finkemeier, I., Schottler, M.A., Holtkamp,  
598 V., Tognetti, V.B., Issakidis-Bourguet, E., Kandlbinder, A., Weis, E., Miginiac-Maslow, M. and  
599 Dietz, K.J. (2006) Peroxiredoxin Q of *Arabidopsis thaliana* is attached to the thylakoids and  
600 functions in context of photosynthesis. *Plant J* **45**, 968-981.

601 Law, Y.S., Zhang, R., Guan, X., Cheng, S., Sun, F., Duncan, O., Murcha, M., Whelan, J.  
602 and Lim, B.L. (2015) Phosphorylation and dephosphorylation of the presequence of pMORF3  
603 during import into mitochondria from *Arabidopsis thaliana*. *Plant Physiol* **169**, 1-12.

604 Lee, C.P., Eubel, H., O'Toole, N. and Millar, A.H. (2008) Heterogeneity of the  
605 mitochondrial proteome for photosynthetic and non-photosynthetic Arabidopsis metabolism.  
606 *Molecular & cellular proteomics : MCP* **7**, 1297-1316.

607 Liang, C., Cheng, S., Zhang, Y., Sun, Y., Fernie, A.R., Kang, K., Panagiotou, G., Lo, C.  
608 and Lim, B.L. (2016) Transcriptomic, proteomic and metabolic changes in Arabidopsis thaliana  
609 leaves after the onset of illumination. *BMC Plant Biol* **16**, 43.

610 Liang, C., Zhang, Y., Cheng, S., Osorio, S., Sun, Y., Fernie, A.R., Cheung, C.Y.M. and



- 611 Lim, B.L. (2015) Impacts of high ATP supply from chloroplasts and mitochondria on the leaf  
612 metabolism of *Arabidopsis thaliana*. *Front. Plant Sci.* **6**, 922.
- 613 Lim, S.L., Voon, C.P., Guan, X., Yang, Y., Gardestrom, P. and Lim, B.L. (2020) *In planta*  
614 study of photosynthesis and photorespiration using NADPH and NADH/NAD<sup>+</sup> fluorescent  
615 protein sensors. *Nature communications* **11**.
- 616 Meyer, E.H., Tomaz, T., Carroll, A.J., Estavillo, G., Delannoy, E., Tanz, S.K., Small, I.D.,  
617 Pogson, B.J. and Millar, A.H. (2009) Remodeled respiration in *ndufs4* with low  
618 phosphorylation efficiency suppresses *Arabidopsis* germination and growth and alters control  
619 of metabolism at night. *Plant Physiol* **151**, 603-619.
- 620 Munekage, Y., Hojo, M., Meurer, J., Endo, T., Tasaka, M. and Shikanai, T. (2002) PGR5  
621 is involved in cyclic electron flow around photosystem I and is essential for photoprotection in  
622 *Arabidopsis*. *Cell* **110**, 361-371.
- 623 Nagai, T., Sawano, A., Park, E.S. and Miyawaki, A. (2001) Circularly permuted green  
624 fluorescent proteins engineered to sense Ca<sup>2+</sup>. *Proc Natl Acad Sci U S A* **98**, 3197-3202.
- 625 Noctor, G. and Foyer, C.H. (2000) Homeostasis of adenylate status during photosynthesis  
626 in a fluctuating environment. *J Exp Bot* **51**, 347-356.
- 627 Noguchi, K. and Yoshida, K. (2008) Interaction between photosynthesis and respiration  
628 in illuminated leaves. *Mitochondrion* **8**, 87-99.
- 629 Oikawa, K., Matsunaga, S., Mano, S., Kondo, M., Yamada, K., Hayashi, M., Kagawa, T.,  
630 Kadota, A., Sakamoto, W., Higashi, S., Watanabe, M., Mitsui, T., Shigemasa, A., Iino, T.,  
631 Hosokawa, Y. and Nishimura, M. (2015) Physical interaction between peroxisomes and  
632 chloroplasts elucidated by in situ laser analysis. *Nature Plants* **1**, 15035.
- 633 Oxborough, K. and Baker, N.R. (1997) Resolving chlorophyll a fluorescence images of  
634 photosynthetic efficiency into photochemical and non-photochemical components –  
635 calculation of qP and Fv-/Fm-; without measuring Fo. *Photosynthesis Research* **54**, 135-142.
- 636 Sato, R., Kawashima, R., Trinh, M.D.L., Nakano, M., Nagai, T. and Masuda, S. (2019)  
637 Significance of PGR5-dependent cyclic electron flow for optimizing the rate of ATP synthesis  
638 and consumption in *Arabidopsis* chloroplasts. *Photosynthesis research* **139**, 359-365.
- 639 Schaeffer, G.W., Sharpe, F.T. and Sicher, R.C. (1997) Fructose 1,6-bisphosphate aldolase  
640 activity in leaves of a rice mutant selected for enhanced lysine. *Phytochemistry* **46**, 1335-1338.
- 641 Scheibe, R. (1987) Nadp+-Malate Dehydrogenase in C-3-Plants - Regulation and Role of  
642 a Light-Activated Enzyme. *Physiol Plantarum* **71**, 393-400.
- 643 Scheibe, R. (2004) Malate valves to balance cellular energy supply. *Physiol Plantarum*  
644 **120**, 21-26.
- 645 Scheibe, R., Backhausen, J.E., Emmerlich, V. and Holtgreffe, S. (2005) Strategies to  
646 maintain redox homeostasis during photosynthesis under changing conditions. *J Exp Bot* **56**,  
647 1481-1489.
- 648 Schwarzländer, M., Logan, D.C., Fricker, M.D. and Sweetlove, L.J. (2011) The circularly



649 permuted yellow fluorescent protein cpYFP that has been used as a superoxide probe is highly  
650 responsive to pH but not superoxide in mitochondria: implications for the existence of  
651 superoxide 'flashes'. *Biochem J* **437**, 381-387.

652 Schweiger, R. and Schwenkert, S. (2014) Protein-protein Interactions visualized by  
653 bimolecular fluorescence complementation in tobacco protoplasts and leaves. *Jove-J Vis Exp*  
654 **85**, e51327.

655 Selinski, J. and Scheibe, R. (2019) Malate valves: old shuttles with new perspectives.  
656 *Plant Biol (Stuttg)* **21**, 21-30.

657 Shameer, S., Ratcliffe, R.G. and Sweetlove, L.J. (2019) Leaf energy balance requires  
658 mitochondrial respiration and export of chloroplast NADPH in the light. *Plant Physiology* **180**,  
659 1947-1961.

660 Sun, F., Carrie, C., Law, S., Murcha, M.W., Zhang, R., Law, Y.S., Suen, P.K., Whelan, J.  
661 and Lim, B.L. (2012a) AtPAP2 is a tail-anchored protein in the outer membrane of chloroplasts  
662 and mitochondria. *Plant signaling & behavior* **7**, 927-932.

663 Sun, F., Liang, C., Whelan, J., Yang, J., Zhang, P. and Lim, B.L. (2013) Global  
664 transcriptome analysis of AtPAP2--overexpressing *Arabidopsis thaliana* with elevated ATP.  
665 *Bmc Genomics* **14**, 752.

666 Sun, F., Suen, P.K., Zhang, Y., Liang, C., Carrie, C., Whelan, J., Ward, J.L., Hawkins, N.D.,  
667 Jiang, L. and Lim, B.L. (2012b) A dual-targeted purple acid phosphatase in *Arabidopsis*  
668 *thaliana* moderates carbon metabolism and its overexpression leads to faster plant growth and  
669 higher seed yield. *The New phytologist* **194**, 206-219.

670 Tikkanen, M., Mekala, N.R. and Aro, E.M. (2014) Photosystem II photoinhibition-repair  
671 cycle protects Photosystem I from irreversible damage. *Bba-Bioenergetics* **1837**, 210-215.

672 Voon, C.P., Guan, X., Sun, Y., Sahu, A., Chan, M.N., Gardeström, P., Wagner, S., Fuchs,  
673 P., Nietzel, T., Versaw, W.K., Schwarzländer, M. and Lim, B.L. (2018) ATP compartmentation  
674 in plastids and cytosol of *Arabidopsis thaliana* revealed by fluorescent protein sensing. *Proc*  
675 *Natl Acad Sci U S A* **115**, 10778-10787.

676 Voon, C.P. and Lim, B.L. (2019) ATP translocation and chloroplast biology *National*  
677 *Science Review* **6**, 1073-1076.

678 Wittig, I., Braun, H.P. and Schagger, H. (2006) Blue native PAGE. *Nat Protoc* **1**, 418-428.

679 Zhang, R., Guan, X., Law, Y.S., Sun, F., Chen, S., Wong, K.B. and Lim, B.L. (2016)  
680 AtPAP2 modulates the import of the small subunit of Rubisco into chloroplasts. *Plant signaling*  
681 *& behavior* **11**, e1239687.

682 Zhang, R., Qi, H., Sun, Y., Xiao, S. and Lim, B.L. (2017) Transgenic *Arabidopsis thaliana*  
683 containing increased levels of ATP and sucrose is more susceptible to *Pseudomonas syringae*.  
684 *PLoS One* **12**, e0171040.

685 Zhang, Y., Yu, L., Yung, K.F., Leung, D.Y., Sun, F. and Lim, B.L. (2012) Over-expression  
686 of AtPAP2 in *Camelina sativa* leads to faster plant growth and higher seed yield. *Biotechnology*

687 *for biofuels* **5**, 19.

688 Zhao, Y.N., Luo, L.L., Xu, J.S., Xin, P.Y., Guo, H.Y., Wu, J., Bai, L., Wang, G.D., Chu,  
689 J.F., Zuo, J.R., Yu, H., Huang, X. and Li, J.Y. (2018) Malate transported from chloroplast to  
690 mitochondrion triggers production of ROS and PCD in *Arabidopsis thaliana*. *Cell Res* **28**, 448-  
691 461.

## Figure Legends

692 **Figure 1. Comparison of the thylakoid architecture between the WT and OE plants.** TEM  
693 micrograph of ultrathin sections of 20-day-old leaves from the WT, OE (OE7 and OE21) and  
694 AtPAP2 knock-out (*pap2*) lines. Average value (n>30) of the diameter (nm) and height (nm) of  
695 the thylakoid in the WT and OE lines were shown. Values marked by different letters in the  
696 same column are significantly different ( $p < 0.05$ ) by Student's t-test. The diameter (nm) and  
697 height (nm) of WT chloroplasts isolated from 28-day-old leaves in another study (15) were  $448$   
698  $\pm 16$  nm and  $113 \pm 5$  nm, respectively.

699 **Figure 2. Comparative analysis of the chloroplast and mitochondrial proteomes of WT**  
700 **and OE7 plants.** **A.** Chloroplasts; **B.** Mitochondria. Proteins from the WT fraction were pre-  
701 labelled with Cy3; proteins from the OE fraction were pre-labelled with Cy5. Combined protein  
702 fractions were separated by 2D Blue-native/SDS-PAGE, and the protein visualization was  
703 carried out by laser scanning at the respective wavelengths using the Typhoon laser scanner.  
704 On the resulting overlay image, Cy3 is represented by red, and Cy5 is represented by green.  
705 Proteins with a reduced abundance in the OE7 line are shown in red; proteins with an increased  
706 abundance in the OE7 line are shown in green; and proteins of equal abundance in the two  
707 compared fractions are shown in yellow. Protein spots were extracted and identified by an  
708 MS/MS analysis. Identified proteins with the highest unused score and at least 2 unique  
709 peptides (95%) were labelled with the corresponding spot ID (Supplemental Tables S2 & S3).  
710 The representative gel images of 3 biological replicates are presented.

711 **Figure 3. *In vivo* analysis of the electron transport activity and CO<sub>2</sub> assimilation rate.** **A.**  
712 Light intensity-dependent NPQ, qP, ETR and Y(II). The 3-week-old plants were dark-  
713 acclimated for 1 hour before the measurement. Data are presented as the mean  $\pm$  SE (n > 10  
714 per line). **B.** P700 Oxidation. Data are presented as the mean  $\pm$  SD (n = 3 per line). Light  
715 intensity was increased in a step-wise manner as stated in the graph. **C.** Light response of CO<sub>2</sub>  
716 assimilation rates (An) under ambient CO<sub>2</sub> concentration. Data are presented as the mean  $\pm$  SE  
717 (n = 5 per line). The asterisks indicate significant differences between the WT and both OE  
718 lines by one-way ANOVA with post-hoc Tukey HSD test ( $p < 0.05$ ).

719 **Figure 4. Assessing organelle activities using fluorescent sensors.** **A.** Change in apparent  
720 MgATP<sup>2-</sup> concentration in the chloroplast stroma. 10-day-old WT and OE7 cotyledon

721 expressing TKTP-AT1.03 were illuminated ( $296 \mu\text{mol photon m}^{-2} \text{s}^{-1}$ ) for 3 mins, followed by  
722 5 mins in the dark. **B.** Changes in the mitochondrial matrix pH sensor ratio (Ex 488/ Ex 405).  
723 10-day-old WT and OE7 cotyledon expressing matrix-localized pH sensor, mt-cpYFP were  
724 illuminated ( $296 \mu\text{mol photon m}^{-2} \text{s}^{-1}$ ) for 30 s, followed by 1 min in the dark. Black and white  
725 bars indicate the dark and illumination periods, respectively. Average value of 6 independent  
726 measurements and SE are shown. The asterisks indicate significant differences between the  
727 WT and the OE line by one-way ANOVA with post-hoc Tukey HSD test ( $p < 0.05$ ). Graphs  
728 were normalized to the initial point. **C.** Effects of the inhibitors on cytosolic ATP concentration.  
729 Inhibitors of complex I ( $50 \mu\text{M}$  rotenone), complex II ( $100 \mu\text{M}$  TTFA) and complex V ( $10 \mu\text{M}$   
730 oligomycin) were applied to 10-day-old WT and OE7 seedling expressing C-AT1.03 seedlings  
731 by vacuum infiltration for 5 min. Before the measurements, the seedlings were incubated in the  
732 dark for 1 hour. Average value of 3 replicates is presented. Error bars are the standard error of  
733 the average  $\text{MgATP}^{2-}$  concentration. Groups with significant difference by one-way ANOVA  
734 with post-hoc Tukey HSD test ( $p < 0.05$ ) are indicated by different letters. The dashed line  
735 indicates the maximal  $\text{MgATP}^{2-}$  concentration ( $1.4 \text{ mM}$ ) that can be reported by AT1.03 (Voon  
736 et al., 2018). The groups marked by asterisks are significantly different from the groups marked  
737 by letters but whether they have intergroup differences are not known.

738 **Figure 5. A model on how efficient collaboration between chloroplasts and mitochondria**  
739 **promote ATP and sucrose production.** ① and ② AtPAP2 on the outer membranes of  
740 chloroplasts and mitochondria promotes the import of certain proteins into these two organelles  
741 via the Toc or the Tom complexes. ③ Higher PSI/PSII ratio and higher LEF generate more  
742 NADPH and ATP at a ratio of 0.78, which are consumed at a ratio of 0.67 by the enhanced  
743 CBB enzymes in the OE chloroplasts for  $\text{CO}_2$  fixation. The surplus reducing equivalents are  
744 exported from the chloroplasts via the malate/OAA shuttle to recycle  $\text{NADP}^+$  as the electron  
745 acceptors of the LEF. ④ Higher reductant-dissipating activities of OE mitochondria reduce  
746 the needs for mitochondria to export reductants from photorespiration in the form of malate.  
747 ⑤ OE chloroplasts with enhanced rate of carbon fixation export more carbon skeletons to the  
748 cytosol. ⑥ OE mitochondria with higher reductant-dissipating activities generate more ATP  
749 through the respiratory electron transfer (RET) chain. ⑦ Higher ATP production in OE  
750 mitochondria and higher output of carbon skeletons from chloroplasts enhance sucrose  
751 synthesis in the cytosol. Red and blue lines indicate upregulated and downregulated  
752 pathways/metabolites in the OE lines, respectively.

753 **Table 1. Enzyme activities of the CBB cycle and the Krebs cycle.**

754 **Table 2 Respiration rates of different complexes of WT and OE7 mitochondria.**

755

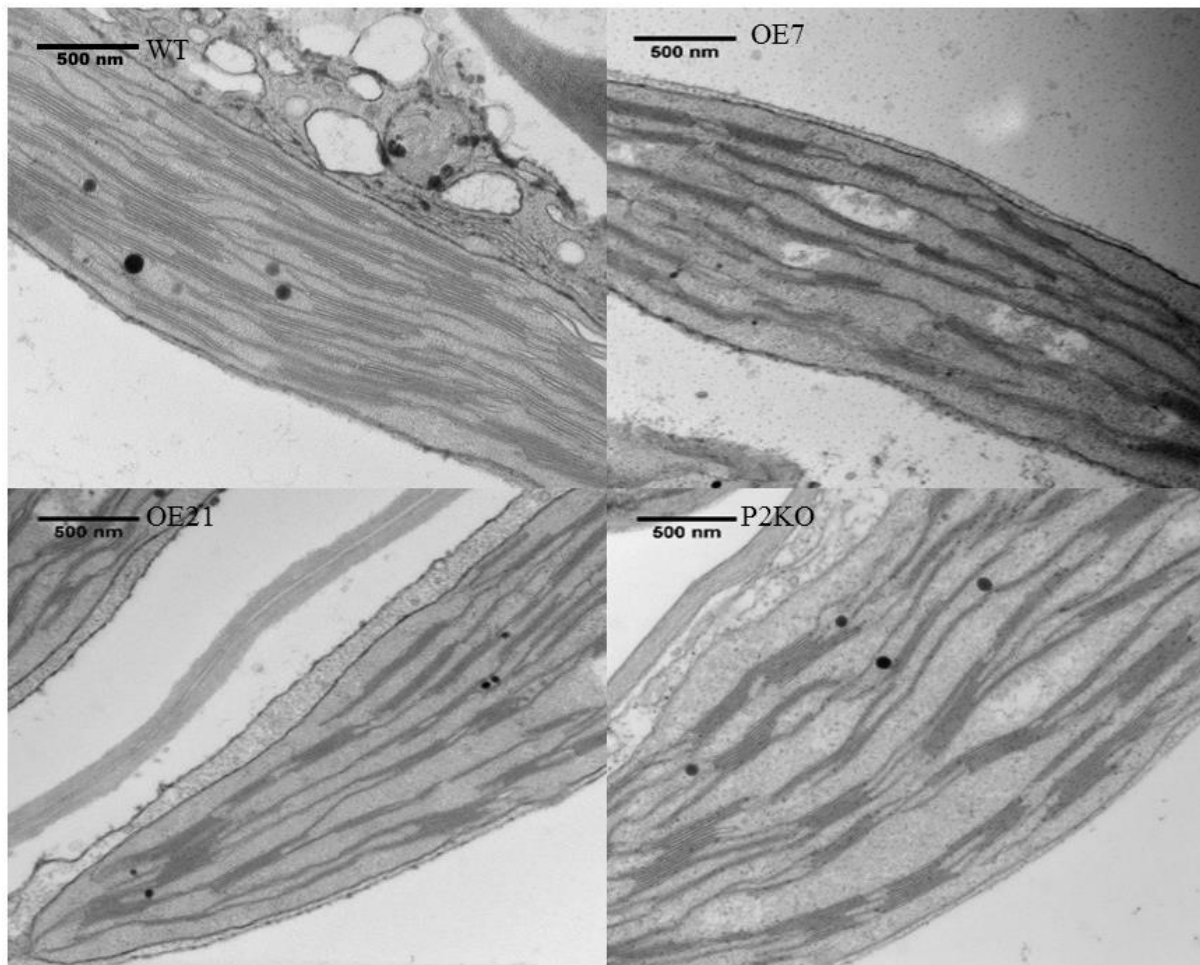

| Mean $\pm$ SEM | Diameter (nm)             | Height (nm)              |
|----------------|---------------------------|--------------------------|
| WT             | 432 $\pm$ 19 <sup>a</sup> | 125 $\pm$ 8 <sup>a</sup> |
| <i>pap2</i>    | 444 $\pm$ 11 <sup>a</sup> | 102 $\pm$ 5 <sup>b</sup> |
| OE7            | 431 $\pm$ 16 <sup>a</sup> | 78 $\pm$ 4 <sup>c</sup>  |
| OE21           | 430 $\pm$ 12 <sup>a</sup> | 79 $\pm$ 3 <sup>c</sup>  |

756

757 **Figure 1. Comparison of the thylakoid architecture between the WT and OE plants.** TEM  
 758 micrograph of ultrathin sections of 20-day-old leaves from the WT, OE (OE7 and OE21) and  
 759 AtPAP2 knock-out (*pap2*) lines. Average value (n>30) of the diameter (nm) and height (nm) of  
 760 the thylakoid in the WT and OE lines were shown. Values marked by different letters in the  
 761 same column are significantly different ( $p < 0.05$ ) by Student's t-test. The diameter (nm) and  
 762 height (nm) of WT chloroplasts isolated from 28-day-old leaves in another study (15) were 448  
 763  $\pm$  16 nm and 113  $\pm$  5 nm, respectively.



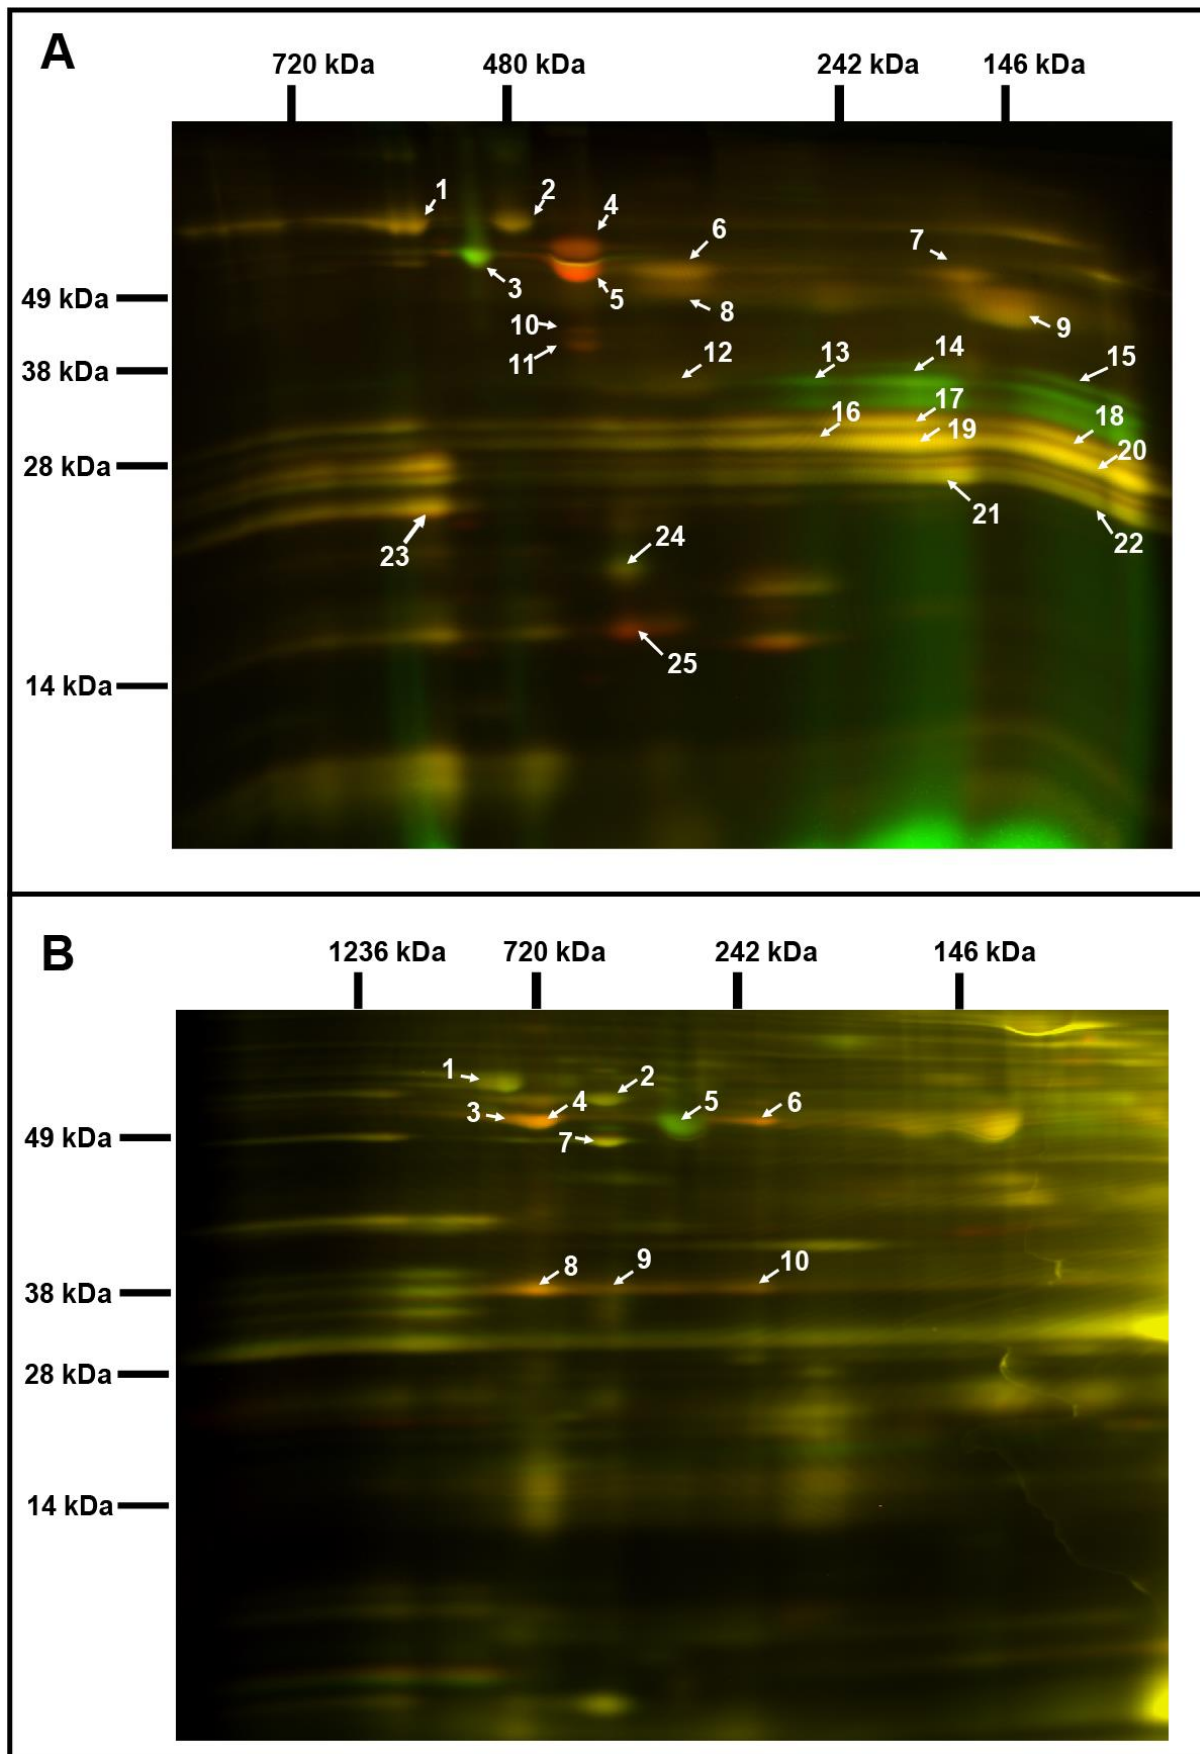

764

765 **Figure 2. Comparative analysis of the chloroplast and mitochondrial proteomes of WT**

766 **and OE7 plants. A. Chloroplasts; B. Mitochondria.** Proteins from the WT fraction were pre-  
767 labelled with Cy3; proteins from the OE fraction were pre-labelled with Cy5. Combined protein  
768 fractions were separated by 2D Blue-native/SDS-PAGE, and the protein visualization was  
769 carried out by laser scanning at the respective wavelengths using the Typhoon laser scanner.  
770 On the resulting overlay image, Cy3 is represented by red, and Cy5 is represented by green.  
771 Proteins with a reduced abundance in the OE7 line are shown in red; proteins with an increased  
772 abundance in the OE7 line are shown in green; and proteins of equal abundance in the two  
773 compared fractions are shown in yellow. Protein spots were extracted and identified by an  
774 MS/MS analysis. Identified proteins with the highest unused score and at least 2 unique  
775 peptides (95%) were labelled with the corresponding spot ID (Supplemental Tables S2 & S3).  
776 The representative gel images of 3 biological replicates are presented.

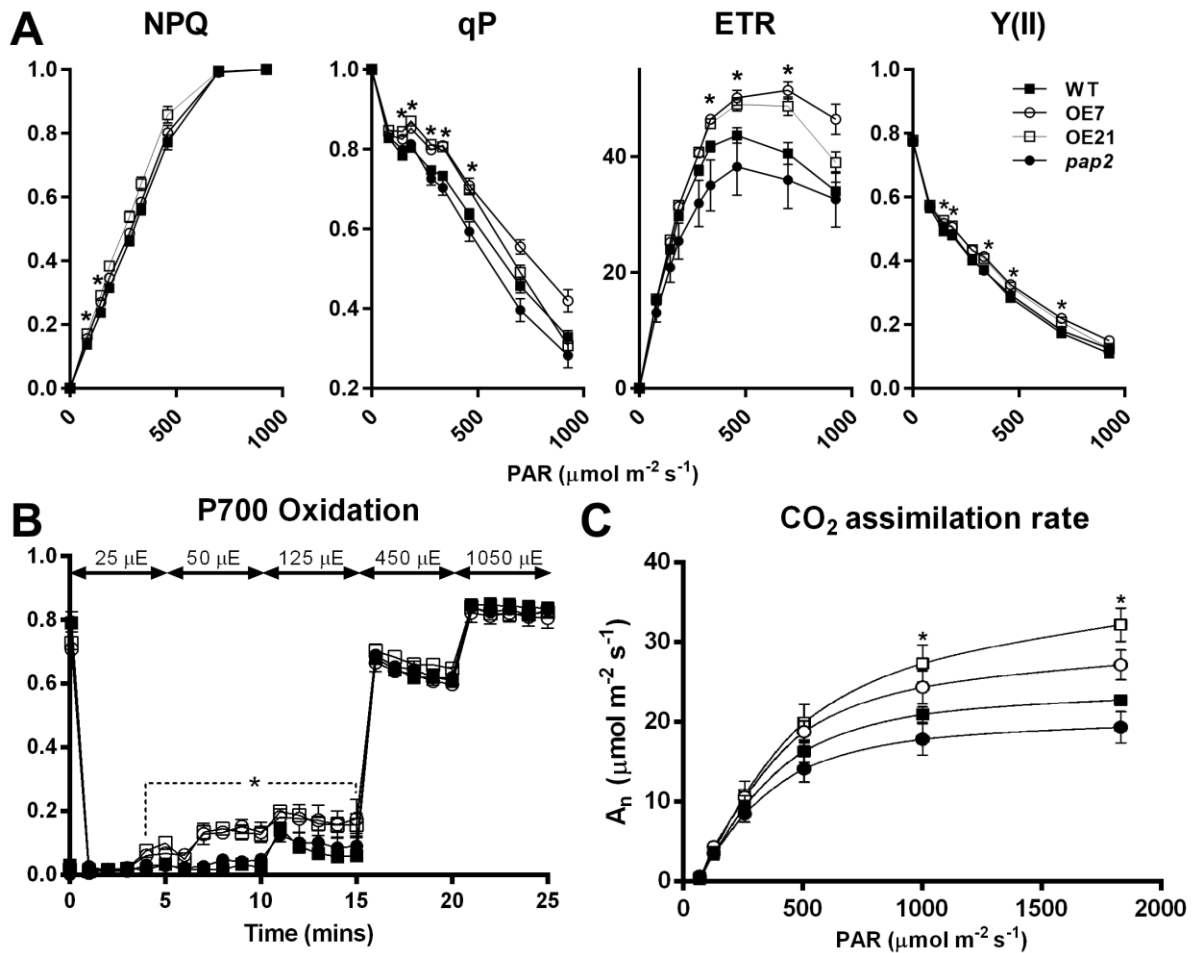

777

778 **Figure 3. *In vivo* analysis of the electron transport activity and CO<sub>2</sub> assimilation rate. A.**

779 Light intensity-dependent NPQ, qP, ETR and Y(II). The 3-week-old plants were dark-

780 acclimated for 1 hour before the measurement. Data are presented as the mean  $\pm$  SE (n > 10

781 per line). **B.** P700 Oxidation. Data are presented as the mean  $\pm$  SD (n = 3 per line). Light

782 intensity was increased in a step-wise manner as stated in the graph. **C.** Light response of CO<sub>2</sub>

783 assimilation rates ( $A_n$ ) under ambient CO<sub>2</sub> concentration. Data are presented as the mean  $\pm$  SE

784 (n = 5 per line). The asterisks indicate significant differences between the WT and both OE

785 lines by one-way ANOVA with post-hoc Tukey HSD test (p < 0.05).



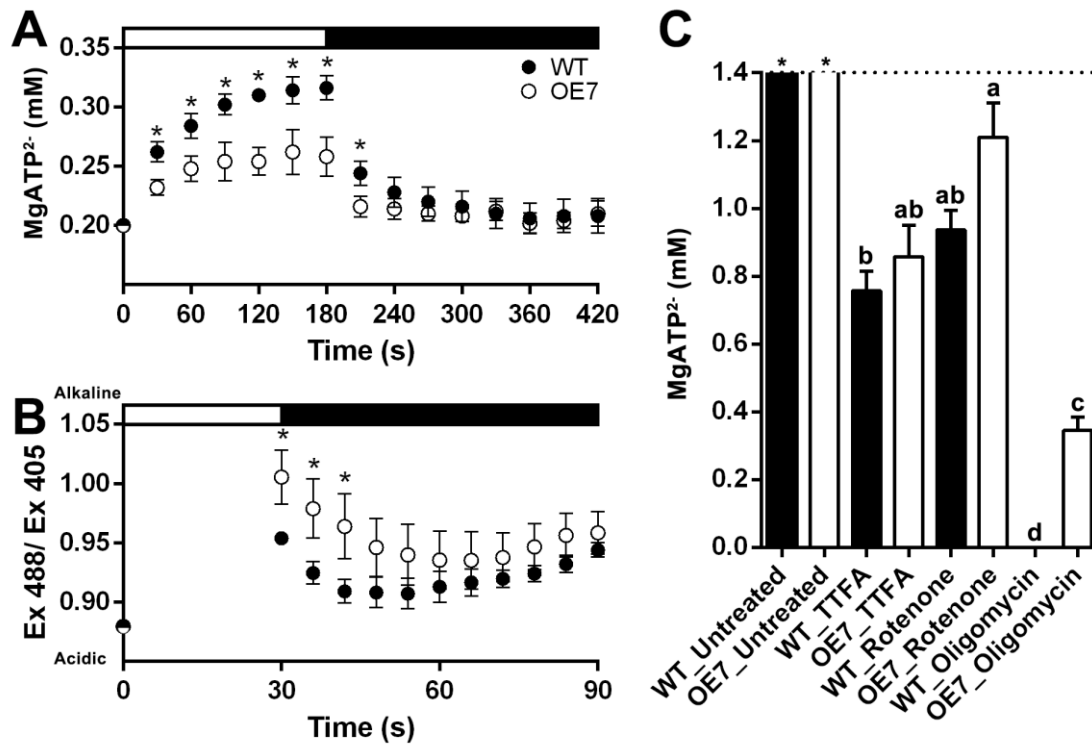

786

787 **Figure 4. Assessing organelle activities using fluorescent sensors.** **A.** Change in apparent  
788 MgATP<sup>2-</sup> concentration in the chloroplast stroma. 10-day-old WT and OE7 cotyledon  
789 expressing TKTP-AT1.03 were illuminated (296  $\mu\text{mol photon m}^{-2} \text{s}^{-1}$ ) for 3 mins, followed by  
790 5 mins in the dark. **B.** Changes in the mitochondrial matrix pH sensor ratio (Ex 488/ Ex 405).  
791 10-day-old WT and OE7 cotyledon expressing matrix-localized pH sensor, mt-cpYFP were  
792 illuminated (296  $\mu\text{mol photon m}^{-2} \text{s}^{-1}$ ) for 30 s, followed by 1 min in the dark. Black and white  
793 bars indicate the dark and illumination periods, respectively. Average value of 6 independent  
794 measurements and SE are shown. The asterisks indicate significant differences between the  
795 WT and the OE line by one-way ANOVA with post-hoc Tukey HSD test ( $p < 0.05$ ). Graphs  
796 were normalized to the initial point. **C.** Effects of the inhibitors on cytosolic ATP concentration.  
797 Inhibitors of complex I (50  $\mu\text{M}$  rotenone), complex II (100  $\mu\text{M}$  TTFA) and complex V (10 $\mu\text{M}$   
798 oligomycin) were applied to 10-day-old WT and OE7 seedling expressing C-AT1.03 seedlings  
799 by vacuum infiltration for 5 min. Before the measurements, the seedlings were incubated in the  
800 dark for 1 hour. Average value of 3 replicates is presented. Error bars are the standard error of  
801 the average MgATP<sup>2-</sup> concentration. Groups with significant difference by one-way ANOVA  
802 with post-hoc Tukey HSD test ( $p < 0.05$ ) are indicated by different letters. The dashed line  
803 indicates the maximal MgATP<sup>2-</sup> concentration (1.4 mM) that can be reported by AT1.03 (Voon  
804 et al., 2018). The groups marked by asterisks are significantly different from the groups marked  
805 by letters but whether they have intergroup differences are not known.

806

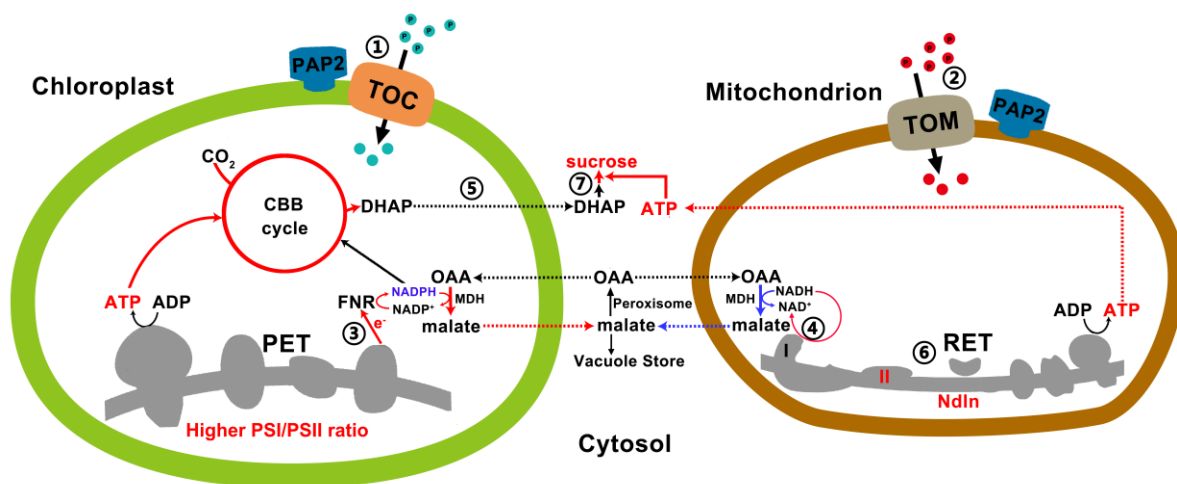

807

808 **Figure 5. A model on how efficient collaboration between chloroplasts and mitochondria**  
 809 **promote ATP and sucrose production.** ① and ② AtPAP2 on the outer membranes of  
 810 chloroplasts and mitochondria promotes the import of certain proteins into these two organelles  
 811 via the Toc or the Tom complexes. ③ Higher PSI/PSII ratio and higher LEF generate more  
 812 NADPH and ATP at a ratio of 0.78, which are consumed at a ratio of 0.67 by the enhanced  
 813 CBB enzymes in the OE chloroplasts for CO<sub>2</sub> fixation. The surplus reducing equivalents are  
 814 exported from the chloroplasts via the malate/OAA shuttle to recycle NADP<sup>+</sup> as the electron  
 815 acceptors of the LEF. ④ Higher reductant-dissipating activities of OE mitochondria reduce  
 816 the needs for mitochondria to export reductants from photorespiration in the form of malate.  
 817 ⑤ OE chloroplasts with enhanced rate of carbon fixation export more carbon skeletons to the  
 818 cytosol. ⑥ OE mitochondria with higher reductant-dissipating activities generate more ATP  
 819 through the respiratory electron transfer (RET) chain. ⑦ Higher ATP production in OE  
 820 mitochondria and higher output of carbon skeletons from chloroplasts enhance sucrose  
 821 synthesis in the cytosol. Red and blue lines indicate upregulated and downregulated  
 822 pathways/metabolites in the OE lines, respectively.

823

824 **Table 1. Enzyme activities of the CBB cycle and the Krebs cycle.**

| Enzyme                              | Source       | WT         | OE           | Change |
|-------------------------------------|--------------|------------|--------------|--------|
| Fructose bisphosphate aldolase      | Chloroplast  | 92 ± 8     | 123 ± 14**   | 1.34X  |
| NADP <sup>+</sup> -GAPDH            | Chloroplast  | 97 ± 11    | 138 ± 4**    | 1.42X  |
| NADP <sup>+</sup> -MDH              | Chloroplast  | 328 ± 20   | 413 ± 40**   | 1.26X  |
| NADP <sup>+</sup> -MDH              | Leaf         | 26 ± 4     | 28 ± 4       | N.S.   |
| NAD <sup>+</sup> -MDH               | Leaf         | 1525 ± 25  | 1439 ± 39    | N.S.   |
| NAD <sup>+</sup> -MDH               | Mitochondria | 4657 ± 206 | 5354 ± 46**  | 1.15X  |
| NAD <sup>+</sup> -malic enzyme, ME  | Mitochondria | 40 ± 3     | 42 ± 3       | N.S.   |
| Pyruvate dehydrogenase, PDC         | Mitochondria | 45 ± 6     | 48 ± 4       | N.S.   |
| Citrate synthase, CS                | Mitochondria | 84 ± 12    | 90 ± 12      | N.S.   |
| Aconitase, ACN                      | Mitochondria | 314 ± 18   | 322 ± 18     | N.S.   |
| NAD <sup>+</sup> -ICDH              | Mitochondria | 43 ± 3     | 63 ± 8**     | 1.47X  |
| NADP <sup>+</sup> -ICDH             | Leaf         | 18.5 ± 2.2 | 6.7 ± 0.5**  | 0.36X  |
| 2-oxoglutarate dehydrogenase, 2OGDH | Mitochondria | 1.4 ± 0.6  | 4.0 ± 0.4**  | 2.86X  |
| Succinate dehydrogenase, SDH        | Mitochondria | 7.6 ± 0.3  | 10.3 ± 1.0** | 1.35X  |
| Succinyl-CoA synthetase             | Mitochondria | 29 ± 1.4   | 300 ± 63**   | 10.3X  |
| Fumarase, FUM                       | Mitochondria | 334 ± 55   | 209 ± 34**   | 0.62X  |

825 *GAPDH*, glyceraldehyde-3-phosphate dehydrogenase; *ICDH*, isocitrate dehydrogenase; *MDH*, malate  
 826 dehydrogenase. All enzyme unit is presented as nmol/min/mg protein.

827 Independent sample t-test was carried out. Significant differences between WT and OE7 are showed by asterisks.

828 \* p <0.05, \*\* p <0.01, n=4. N.S.: Not significant.

829

830 **Table 2 Respiration rates of different complexes of WT and OE7 mitochondria.**

| Enzyme     | Substrate          | ADP | Rotenone | WT     | OE7       | Change |
|------------|--------------------|-----|----------|--------|-----------|--------|
| Complex I  | deamino-NADH       | -   | -        | 30 ± 6 | 33 ± 5    | ns     |
|            |                    | -   | +        | 8 ± 3  | 8 ± 5     | ns     |
| Complex II | Succinate          | -   | -        | 49 ± 3 | 48 ± 23   | ns     |
|            |                    | +   | -        | 75 ± 4 | 92 ± 10 * | 1.23X  |
| NdEx       | NADH               | -   | -        | 45 ± 4 | 45 ± 12   | ns     |
|            |                    | +   | -        | 65 ± 4 | 68 ± 4    | ns     |
| NdIn       | Malate + Glutamate | -   | +        | 39 ± 4 | 46 ± 6    | ns     |
|            |                    | +   | +        | 64 ± 8 | 85 ± 4 *  | 1.32X  |

831 Oxygen consumption rates of complex I (rotenone-sensitive deamino-NADH oxidation), complex II, external  
 832 NADH dehydrogenase, internal NADH dehydrogenase (rotenone-insensitive NADH oxidation) were expressed  
 833 as nmol min<sup>-1</sup> mg<sup>-1</sup> protein.

834 \* indicates statistically significant difference (p <0.05, n≥3) and ns indicates not significant difference between  
 835 WT and OE7 by Student's t test.

836
