# Supplementary material for: Modulating the activities of chloroplasts and mitochondria promotes ATP production and plant growth
Source: bioRxiv or medRxiv preprint supplement (doi:10.1101/2020.09.09.289967), 2021-04-19
Supplement: Supplementary file [file media-1.pdf]

Supplemental Figures and Tables

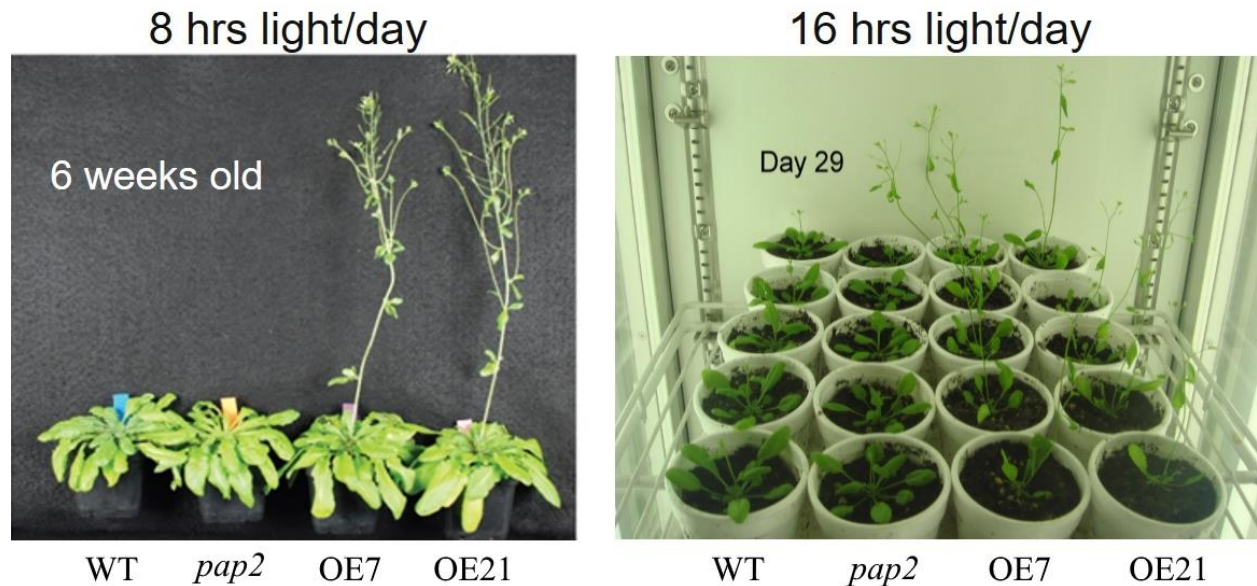

**Supplemental Figure 1. The OE lines grew faster under both SD (8h/16h) and LD (16h/8h) conditions.**

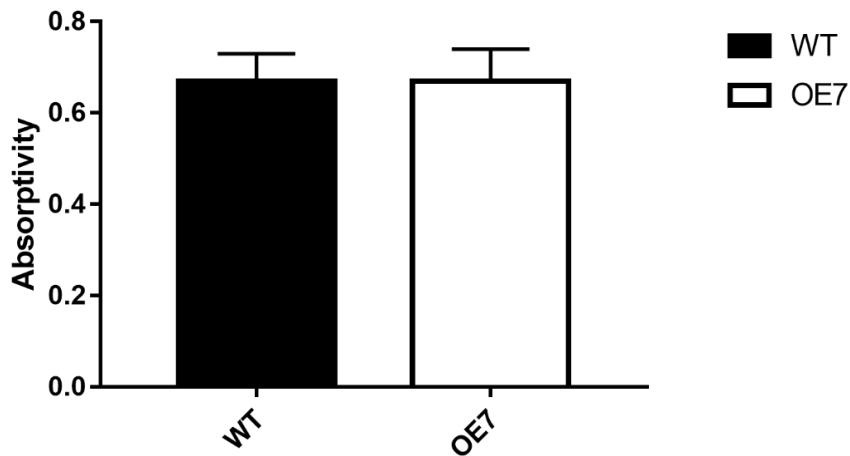

**Supplemental Figure S2. Leaf absorptivity is similar between WT line and AtPAP2 overexpression line (OE7).** Absorptivity of 20-day-old leaves were determined by IMAGING-PAM M-Series Maxi Version (WALZ, Germany). First an NIR (near-infrared)-remission image and then a R (red)-remission image was measured, the absorptivity was automatically calculated pixel by pixel according to the equation  $\text{absorptivity} = 1 - R/\text{NIR}$ . This approach is based on the empirical fact that pigments that contribute to the absorption of PAR (photosynthetic active radiation) do not show significant absorption bands in the NIR spectral region. On the other hands, pigments that absorb NIR are likely to also absorb Red light. Bar graph represents the mean value of absorptivity with SD (n = 63).

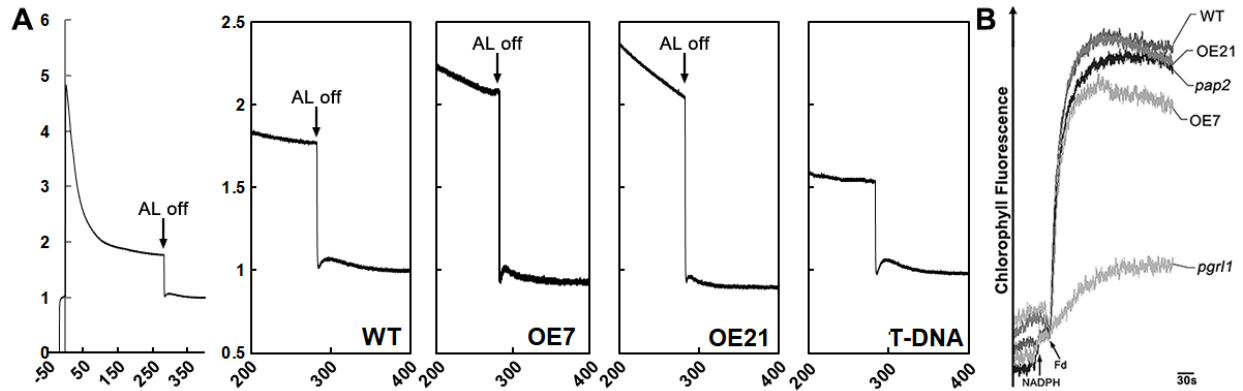

**Supplemental Figure S3. *In vivo* analysis of the cyclic electron flow rate.** **A.** Post-illumination chlorophyll fluorescence transient for the measuring of NAD(P)H dehydrogenase (NDH)-CEF. Typical induction kinetics of chlorophyll fluorescence in a dark-acclimated leaf of WT *Arabidopsis* under illumination with actinic light (AL,  $50 \mu\text{mol photon m}^{-2} \text{s}^{-1}$ ) were shown. Changes in chlorophyll fluorescence after the cessation of the actinic illumination were compared at a higher time resolution. Chlorophyll fluorescence was normalized to the original level in the dark ( $F_0$ ). **B.** Ruptured chloroplast assay for the quantification of antimycin A-sensitive Fd-dependent CEF. After the addition of NADPH and Fd to freshly ruptured chloroplasts, the increase in chlorophyll fluorescence was measured ( $n = 3$ ). The *pgr1* mutant served as a negative control.

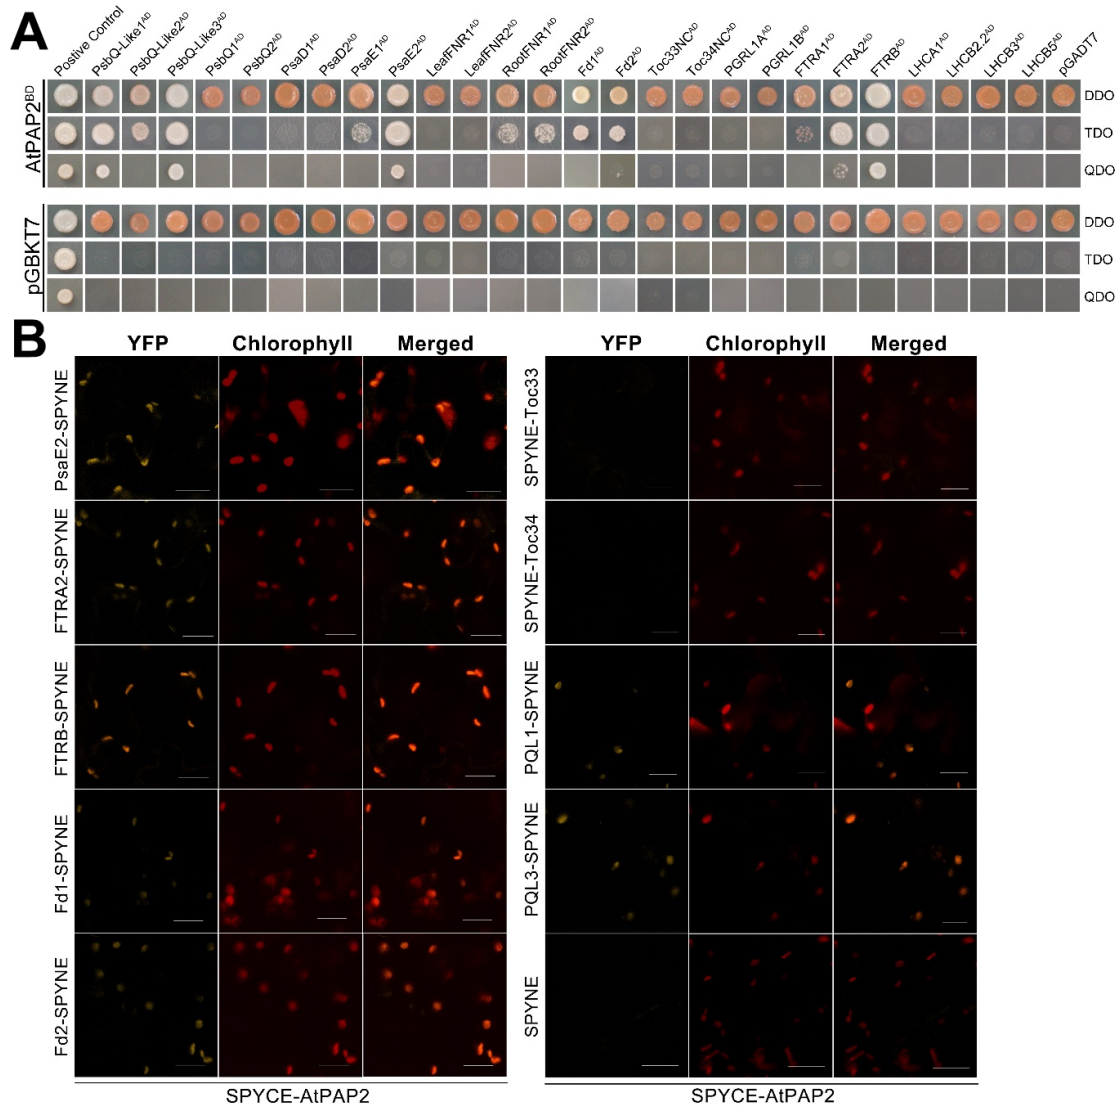

**Supplemental Figure S4. AtPAP2 selectively interacts with certain photosystem proteins. A.** Mature AtPAP2 protein without the signal peptide and C-terminus (a.a. 25–613, P2NC) interacted with several photosystem proteins (PQL1-AD, PQL2-AD, PQL3-AD, PsaE2-AD, FTRA2-AD and FTRB-AD). Blank vectors of BD (pGBKT7) and AD (pGADT7) were co-transformed with bait and prey, respectively, to assess auto-activation. The assays were carried on dropout medium of DDO (SD/-Leu/-Trp), TDO (SD/-Leu/-Trp/-His) and QDO (SD/-Ade/-His/-Leu/-Trp). **B.** BiFC assay of the interaction between AtPAP2 and candidate proteins. YFP<sup>N</sup>-fused photosystem proteins (PsaE2, FTRA2, FTRB, Fd1, Fd2, PQL1, PQL3, Toc33 and Toc34) and YFP<sup>C</sup>-AtPAP2 were transiently expressed in tobacco leaves. Empty SPYNE vectors were used as controls. Reconstituted YFP fluorescence was monitored at 514 nm (left panel with PMT detector emission bandwidth of 488–550 nm). Chlorophyll autofluorescence was excited at 458 nm (middle panel with PMT detector emission bandwidth of 650–710 nm). An overlay of the YFP signal and the chlorophyll autofluorescence is shown in the right panel. Scale bars: 20  $\mu$ m. All images were captured using the same gain settings as the corresponding PMT channels. The representative images of 3 biological replicates are presented.

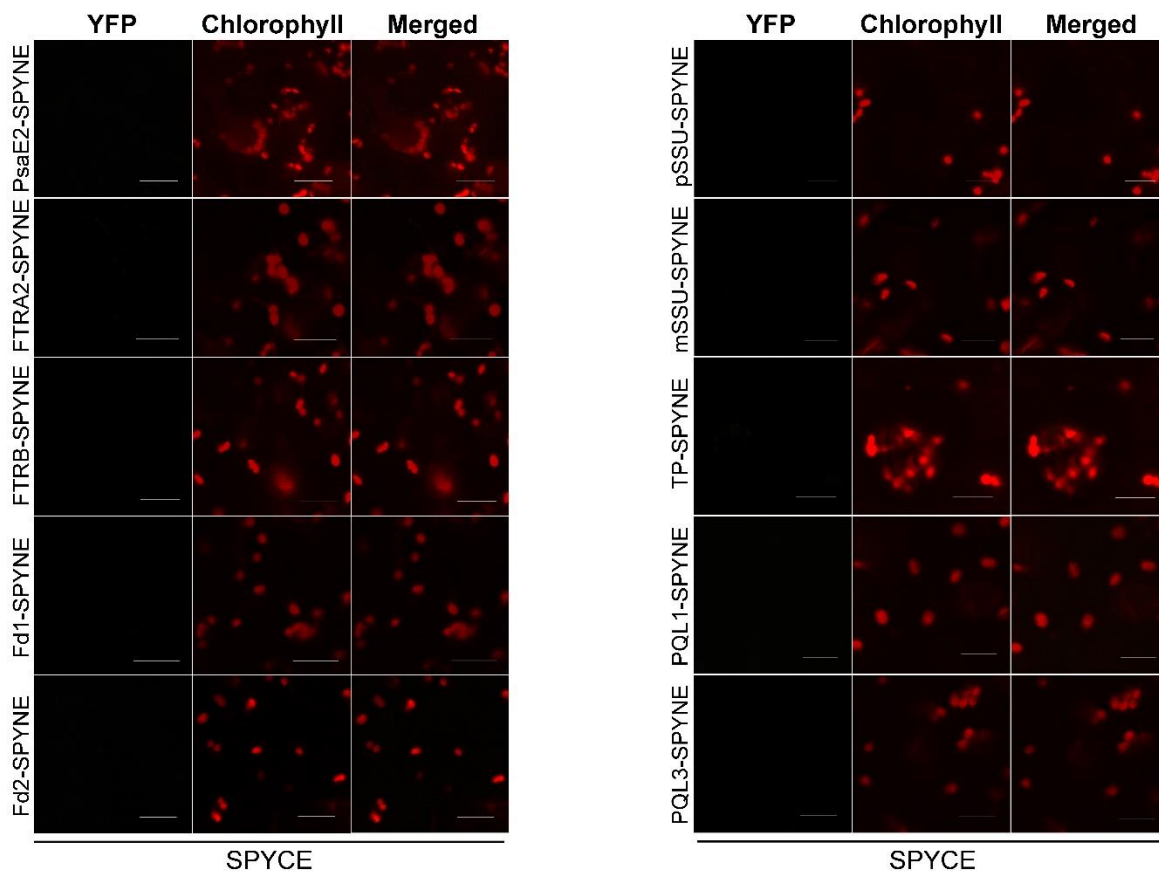

**Supplemental Figure S5. Results of BiFC negative controls.** YFPN-fused photosynthetic apparatus subunits (PsaE2, FTRA2, FTRB, PQL1, PQL3, Fd1, Fd2, SP, mSSU and pSSU) and empty SPYCE vector were transiently expressed in tobacco leaves as controls. Reconstituted YFP fluorescence was monitored at 514 nm (left panel with PMT detector emission bandwidth of 488–550 nm). Chlorophyll autofluorescence was excited at 458 nm (middle panel with PMT detector emission bandwidth of 650–710 nm). An overlay of the YFP signal and the chlorophyll autofluorescence is shown in the right panel. Scale bars: 20  $\mu$ m. All of the images were captured at the same gain settings as the corresponding PMT channels.

**Supplemental Table S1. Photosynthetic pigment content.**

|                   | WT                       | <i>pap2</i>               | OE7                       | OE21                      |
|-------------------|--------------------------|---------------------------|---------------------------|---------------------------|
| Chlorophyll a     | 8.43 + 0.44 <sup>a</sup> | 10.62 + 0.18 <sup>b</sup> | 6.53 + 1.12 <sup>c</sup>  | 5.55 + 0.29 <sup>c</sup>  |
| Chlorophyll b     | 3.35 + 0.21 <sup>a</sup> | 3.96 + 0.87 <sup>b</sup>  | 2.81 + 0.36 <sup>ac</sup> | 2.16 + 0.16 <sup>c</sup>  |
| $\beta$ -Carotene | 0.28 + 0.02 <sup>a</sup> | 0.30 + 0.07 <sup>b</sup>  | 0.22 + 0.03 <sup>c</sup>  | 0.18 + 0.00 <sup>ac</sup> |
| Lutein            | 1.09 + 0.06 <sup>a</sup> | 1.28 + 0.07 <sup>b</sup>  | 0.83 + 0.15 <sup>c</sup>  | 0.68 + 0.02 <sup>c</sup>  |
| Violaxanthin      | 0.28 + 0.02 <sup>a</sup> | 0.29 + 0.08 <sup>a</sup>  | 0.26 + 0.07 <sup>a</sup>  | 0.18 + 0.01 <sup>a</sup>  |

Pigments were extracted 8 hours after the light period from the leaves of 20-day-old *Arabidopsis* under LD regime. Values ( $\text{mg g}^{-1}$  DW of tissues) marked by different letters are significantly different ( $p < 0.05$ ) in the same row by one-way ANOVA analysis followed by HSD test. DW, dry weight.

**Supplemental Table S2. Chloroplast proteins identified in 2D BN PAGE.**

| <b>Spot ID</b> | <b>Peptides (95%)</b> | <b>Unused peptide</b> | <b>Protein Name</b> | <b>Accession</b> | <b>Function</b>        | <b>Average Ratio (OE/WT)</b> |
|----------------|-----------------------|-----------------------|---------------------|------------------|------------------------|------------------------------|
| 1              | 103                   | 162.86                | PsaA                | ATCG00350        | PS I core protein      | 1.00                         |
| 1              | 80                    | 98.48                 | PsaB                | ATCG00340        | PS I core protein      | 1.00                         |
| 2              | 38                    | 69.11                 | PsaA                | ATCG00350        | PS I core protein      | 0.82                         |
| 2              | 38                    | 62.91                 | PsaB                | ATCG00340        | PS I core protein      | 0.82                         |
| 23             | 72                    | 78.56                 | PsaD1               | AT4G02770        | PS I core protein      | 0.97                         |
| 12             | 23                    | 29.77                 | PsbA, D1            | ATCG00020        | PS II core protein     | 0.78*                        |
| 6              | 95                    | 82.02                 | PsbB, CP47          | ATCG00680        | PS II core protein     | 0.63**                       |
| 7              | 58                    | 96.16                 | PsbB, CP47          | ATCG00680        | PS II core protein     | 0.72*                        |
| 8              | 51                    | 64.74                 | PsbC, CP43          | ATCG00680        | PS II core protein     | 0.65**                       |
| 9              | 181                   | 249.7                 | PsbC, CP43          | ATCG00280        | PS II core protein     | 0.80                         |
| 12             | 41                    | 58.68                 | PsbD, D2            | ATCG00270        | PS II core protein     | 0.78*                        |
| 13             | 108                   | 136.85                | PsbO1, OE33         | AT5G66570        | PS II core protein     | 6.83**                       |
| 14             | 59                    | 83.54                 | PsbO1, OE33         | AT5G66570        | PS II core protein     | 8.64**                       |
| 15             | 15                    | 26.96                 | PsbO1, OE33         | AT5G66570        | PS II core protein     | 3.02**                       |
| 21             | 22                    | 25.47                 | PsbS, NPQ4          | AT1G44575        | PS II core protein     | 1.06                         |
| 22             | 25                    | 39.68                 | PsbS, NPQ4          | AT1G44575        | PS II core protein     | 1.01                         |
| 16             | 145                   | 173.1                 | Lhcb1.4             | AT2G34430        | LHC II protein         | 0.88                         |
| 16             | 57                    | 27.88                 | Lhcb2.2             | AT2G05070        | LHC II protein         | 0.88                         |
| 17             | 91                    | 140.01                | Lhcb4.1, CP29       | AT5G01530        | LHC II protein         | 1.44                         |
| 18             | 59                    | 63.18                 | Lhcb4.1, CP29       | AT5G01530        | LHC II protein         | 0.79                         |
| 18             | 33                    | 33.7                  | Lhcb1.4             | AT2G34430        | LHC II protein         | 0.79                         |
| 19             | 92                    | 10.33                 | Lhcb1.1             | AT1G29920        | LHC II protein         | 0.92                         |
| 19             | 93                    | 129.87                | Lhcb1.4             | AT2G34430        | LHC II protein         | 0.92                         |
| 19             | 47                    | 33.61                 | Lhcb2.2             | AT2G05070        | LHC II protein         | 0.92                         |
| 19             | 37                    | 52.97                 | Lhcb5, CP26         | AT4G10340        | LHC II protein         | 0.92                         |
| 20             | 129                   | 12.78                 | Lhcb1.3             | AT1G29930        | LHC II protein         | 0.84                         |
| 20             | 125                   | 190.01                | Lhcb1.4             | AT2G34430        | LHC II protein         | 0.84                         |
| 20             | 57                    | 47.46                 | Lhcb2.2             | AT2G05070        | LHC II protein         | 0.84                         |
| 20             | 56                    | 92.39                 | Lhcb5, CP26         | AT4G10340        | LHC II protein         | 0.84                         |
| 21             | 29                    | 35.92                 | Lhcb6, CP24         | AT1G15820        | LHC II protein         | 1.06                         |
| 22             | 71                    | 99.62                 | Lhcb6, CP24         | AT1G15820        | LHC II protein         | 1.01                         |
| 24             | 32                    | 45.98                 | PetC                | AT4G03280        | Cytochrome B6f complex | 1.1                          |
| 25             | 3                     | 3.36                  | PetD                | ATCG00730        | Cytochrome B6f complex | 0.25**                       |
| 4              | 306                   | 320.72                | atpA                | ATCG00120        | ATP synthase           | 0.32**                       |
| 5              | 325                   | 381.21                | atpB                | ATCG00480        | ATP synthase           | 0.36**                       |
| 10             | 64                    | 87.68                 | atpC1               | AT4G04640        | ATP synthase           | 0.60**                       |
| 11             | 58                    | 62.97                 | atpC1               | AT4G04640        | ATP synthase           | 0.66**                       |
| 3              | 271                   | 405.15                | RBCL                | ATCG00490        | Calvin cycle           | 4.07**                       |

Isolated chloroplast proteins from WT and OE7 were resolved by 2D BN/SDS-PAGE and the protein spots were extracted for MS/MS analysis. Protein candidates with the highest unused score and at least 2 unique peptides (95%) were shown. Average ratio is the mean of the value (OE/WT) from three biological replicates. Spots with fold change of  $\pm 1.2$  or  $\pm 1.5$  folds and  $p < 0.05$  by one-way ANOVA are denoted by \* and \*\*, respectively.

**Supplemental Table S3. Summary of identified mitochondrial protein spots.**

| Spot ID | Peptides (95%) | Unused peptide | Protein name                      | Accession   | Protein complex | Ratio (OE/WT) |
|---------|----------------|----------------|-----------------------------------|-------------|-----------------|---------------|
| 1       | 327            | 328.85         | Heat Shock Protein 60-3B          | AT3G23990.1 | HSP60           | 1.07          |
| 1       | 262            | 158.77         | Heat Shock Protein 60-2           | AT2G33210.1 | HSP60           | 1.07          |
| 2       | 244            | 288.80         | MPPbeta                           | AT3G02090.1 | Complex III     | 0.99          |
| 3       | 295            | 358.38         | ATP synthase beta-subunit         | AT5G08690.1 | Complex V       | 0.52**        |
| 3       | 292            | 4.48           | ATP synthase beta-subunit         | AT5G08680.1 | Complex V       | 0.52**        |
| 3       | 239            | 312.37         | ATP synthase alpha-subunit        | AT2G07698.1 | Complex V       | 0.52**        |
| 4       | 217            | 287.35         | ATP synthase beta-subunit         | AT5G08690.1 | Complex V       | 0.43**        |
| 4       | 209            | 6.00           | ATP synthase beta-subunit         | AT5G08680.1 | Complex V       | 0.43**        |
| 4       | 8              | 234.30         | ATP synthase alpha-subunit        | AT2G07698.1 | Complex V       | 0.43**        |
| 5       | 622            | 637.08         | RBCL                              | ATCG00490.1 |                 | 2.33**        |
| 6       | 342            | 349.23         | ATP synthase beta-subunit         | AT5G08690.1 | Complex V       | 0.56**        |
| 6       | 335            | 6.00           | ATP synthase beta-subunit         | AT5G08680.1 | Complex V       | 0.56**        |
| 6       | 204            | 220.55         | ATP synthase alpha-subunit        | AT2G07698.1 | Complex V       | 0.56**        |
| 7       | 245            | 315.84         | Insulinase protein                | AT1G51980.1 | Complex III     | 1.08          |
| 7       | 73             | 11.84          | MPPalpha                          | AT3G16480.1 | Complex III     | 1.08          |
| 7       | 14             | 22.21          | MPPbeta                           | AT3G02090.1 | Complex III     | 1.08          |
| 8       | 242            | 335.95         | ATP synthase gamma-subunit (ATP3) | AT2G33040.1 | Complex V       | 0.64**        |
| 8       | 25             | 41.00          | ATP Synthase subunit 1 (ATP1)     | ATMG01190.1 | Complex V       | 0.64**        |
| 8       | 20             | 35.36          | ATP synthase beta-subunit         | AT5G08690.1 | Complex V       | 0.64**        |
| 9       | 19             | 28.61          | ATP synthase alpha-subunit        | AT2G07698.1 | Complex V       | 0.65**        |
| 9       | 32             | 56.70          | ATP synthase gamma-subunit (ATP3) | AT2G33040.1 | Complex V       | 0.65**        |
| 9       | 29             | 50.43          | ATP synthase beta-subunit         | AT5G08690.1 | Complex V       | 0.65**        |
| 10      | 87             | 131.85         | ATP synthase gamma-subunit (ATP3) | AT2G33040.1 | Complex V       | 0.64**        |
| 10      | 49             | 72.64          | ATP synthase beta-subunit         | AT5G08670.1 | Complex V       | 0.64**        |

Isolated mitochondrial proteins from WT and OE7 were resolved by 2D BN/SDS-PAGE and the mitochondrial protein spots were extracted for MS/MS analysis. Protein candidates with the highest unused score and at least 2 unique peptides (95%) were shown. Average ratio is the mean



of the value (OE/WT) from three biological replicates. Spots with fold change of  $\pm 1.2$  or  $\pm 1.5$  folds and  $p < 0.05$  by one-way ANOVA are denoted by \* and \*\*, respectively.

**Supplemental Table S4. AtPAP2-interacting proteins identified by Y2H library screening.**

| AGI code  | No. of clones | a.a. residues | Sequence in clone   | Phosphorylation sites (1-50) | pI    | Proteins                                        | Experimental location |
|-----------|---------------|---------------|---------------------|------------------------------|-------|-------------------------------------------------|-----------------------|
| At1g14150 | 5             | 190           | All are full length | T9,Y13,T46                   | 8.93  | PsbQ-like (PQL1)                                | Plastid               |
| At1g18640 | 5             | 695           | All are full length | T6                           | 6.29  | 3-Phosphoserine phosphatase                     | Plastid               |
| At1g26220 | 1             | 197           | Full length         | T9,T27,S31,Y46,S47,S49       | 9.79  | Acyl-CoA N-acyltransferases superfamily protein | Plastid               |
| At1g29900 | 2             | 1187          | aa.771-End          | S18,S19,S26,S31,S33          | 5.45  | Carbamoyl phosphate synthetase B (CARB)         | Plastid               |
| At1g30510 | 1             | 382           | aa.135-End          | S15,T49                      | 8.85  | Ferredoxin--NADP+ reductase (RFNR2)             | Plastid               |
| At2g04700 | 5             | 146           | All are full length | S15,T20,T34,S48              | 7.98  | Ferredoxin-thioredoxin reductase B              | Plastid               |
| At2g05990 | 1             | 390           | aa.149-End          | S17,S19,S20,Y30              | 9.36  | Enoyl-ACP reductase                             | Plastid               |
| At2g20260 | 1             | 145           | Full length         | S24,S25                      | 10.54 | Subunit E of photosystem I (PsaE2)              | Plastid               |
| At2g22360 | 1             | 442           | aa.228-End          | Y25,S32                      | 9.49  | DNAJ heat shock family protein A6               | Plastid               |
| At2g34860 | 1             | 186           | Full length         | S16,S39,S42,S45,S47,S49      | 9.25  | DnaJ/Hsp40 cysteine-rich domain protein         | Plastid               |
| At2g35500 | 1             | 387           | Full length         | S14,S34,S35                  | 6.19  | Shikimate kinase-like 2 (SKL2)                  | Plastid               |
| At4g20760 | 1             | 298           | Full length         | S14,S34,S37,T32              | 10.24 | NAD(P)-binding Rossmann-fold protein            | Plastid               |
| At4g21860 | 1             | 202           | Full length         | T7,S34,S45,S46               | 8.68  | Methionine sulfoxide reductase B2               | Plastid               |
| At4g25370 | 1             | 238           | Full length         | S26,S28,S29,T36              | 9.78  | Double Clp-N motif protein                      | Plastid               |
| At4g35860 | 1             | 211           | Full length         | T49                          | 7.03  | GTP-binding protein GB2 (GB2)                   | Plastid               |
| At5g06340 | 3             | 227           | All are full length | S37,S50                      | 8.77  | Nudix hydrolase 27 (NUDX27)                     | Plastid               |
| At5g08280 | 1             | 382           | Full length         | T26,S44                      | 8.62  | Hydroxymethylbilane synthase                    | Plastid               |
| At5g11450 | 4             | 297           | All are full length | S20,Y27,T43,S45,S47          | 9.06  | PPD5                                            | Plastid               |

|           |   |     |                          |                     |       |                                                         |                                     |
|-----------|---|-----|--------------------------|---------------------|-------|---------------------------------------------------------|-------------------------------------|
| At5g11650 | 1 | 390 | aa.323-End               | T12                 | 8.73  | Alpha/beta fold hydrolase family protein Rhodanese-like | Plastid                             |
| At5g19370 | 4 | 299 | All are full length      | T7,S9,S13,T30       | 8.62  | Peptidyl-prolyl cis-trans isomerase                     | Plastid                             |
| At5g21222 | 1 | 831 | aa.523-End               | Y13,T33,T35         | 8.01  | Serine/threonine protein kinase                         | Plastid                             |
| At5g38430 | 2 | 181 | Full length              | S14,S32,T36         | 7.83  | Ribulose biphosphate carboxylase small chain 1B         | Plastid                             |
| At5g66120 | 2 | 442 | aa.1-344 and 1-343       | T14,T31,Y50         | 7.53  | 3-dehydroquinate synthase                               | Plastid                             |
| At4g33520 | 1 | 949 | Full length              | T14                 | 9.02  | Copper-transporting ATPase PAA1 (PAA1)                  | Plastid inner membrane              |
| At1g53670 | 1 | 202 | Full length              | Y23,Y48             | 9.20  | Methionine sulfoxide reductase B1                       | Plastid stroma                      |
| At2g20270 | 1 | 206 | Full length              | T45                 | 8.94  | Monothiol glutaredoxin-S12                              | Plastid stroma                      |
| At2g38270 | 4 | 293 | All are full length      | S15,T31,T37,S41     | 8.07  | Monothiol glutaredoxin 16                               | Plastid stroma                      |
| At2g36460 | 2 | 358 | aa.76-End and aa.112-End | S32,T33,T35,S42     | 7.46  | Fructose-bisphosphate aldolase, class I                 | Plastid, cytosol, PM, extracellular |
| At1g18080 | 1 | 327 | aa.53-End                | T19,T23             | 7.81  | RACK1A                                                  | Plastid, cytosol, PM, nucleus       |
| At1g70580 | 1 | 481 | aa.145-End               | Y8,Y27              | 6.52  | Alanine-2-oxoglutarate aminotransferase 2               | Plastid, Peroxisome                 |
| At5g16370 | 1 | 552 | aa. 871-1766             | S11,T15             | 6.97  | Acyl activating enzyme 5 (AAE5)                         | Plastid, Peroxisome                 |
| At4g25130 | 3 | 258 | All are full length      | S7                  | 8.92  | Methionine sulfoxide reductase                          | Plastid, stroma                     |
| At2g35240 | 1 | 232 | Full length              | S19,S26,S40,Y49     | 9.14  | pMORF6                                                  | Mitochondria                        |
| At5g40770 | 1 | 277 | aa.47-End                | T34                 | 7.89  | Prohibitin 3 (PHB3)                                     | Mitochondria                        |
| At4g35830 | 1 | 898 | aa.467-End               | Y41                 | 6.35  | Aconitate hydratase 1 (ACO1)                            | Mitochondria and cytosol            |
| At1g05060 | 1 | 253 | Full length              | Y16,S32,T35,S41,S42 | 10.02 | Uncharacterized protein                                 | N/A                                 |
| At1g29810 | 1 | 187 | Full length              | T42,S47,T49,T50     | 10.37 | Transcriptional coactivator/pterin dehydratase          | N/A                                 |

|           |   |     |            |                 |       |                                         |     |
|-----------|---|-----|------------|-----------------|-------|-----------------------------------------|-----|
| At1g31817 | 1 | 314 | aa.48-End  | S31,S33,S37,S48 | 11.15 | 30S ribosomal protein S11               | N/A |
| At1g53140 | 1 | 817 | aa.620-End | Y7,T10,T14      | 7.47  | Dynamin related protein 5A (DRP5A)      | N/A |
| At2g38080 | 1 | 558 | aa.172-534 | T49             | 9.60  | Laccase/Diphenol oxidase family protein | N/A |

Experimental location: determined by GFP or MS analysis (SUBA3, <http://suba.plantenergy.uwa.edu.au/>)

Phosphorylation sites (1-50): Experimental determined phosphorylation sites in the first 50 a.a. residues were retrieved from Phosphat 4.0 (<http://phosphat.uni-hohenheim.de/phosphat.html>)

Predicted location: predicted by SUBA3 (<http://suba.plantenergy.uwa.edu.au/>)

Predicted phosphorylation sites (1-50) are shown in italics. The prediction was carried out at Phosphat 4.0 or NetPhos 2.0 (<http://www.cbs.dtu.dk/services/NetPhos/>)

**Supplemental Table S5. Primer list.**

| <b>Vector<br/>(Purpose)</b>  | <b>Primer Name<br/>(AGI code)</b> | <b>Primer Sequence (5'-3')<sup>1</sup></b>                                    |
|------------------------------|-----------------------------------|-------------------------------------------------------------------------------|
| pGBKT7<br>(Yeast two-hybrid) | 25-613aaAtPAP2<br>(AT1G13900)     | F: TTCTCATATGACCATTTCAATTTCCCC<br>R: GCATGTCGACCAGCATTAGATTCTGATTTTC          |
| pGADT7<br>(Yeast two-hybrid) | 42-181aaSSU1B<br>(AT5G38430)      | F: ATTCCATATGGACATTACTTCCATCACAAGC<br>R: ATTACTCGAGAGCATCAGTGAAGCTTGGGG       |
| pGADT7<br>(Yeast two-hybrid) | 1-50aaSSU1B<br>(AT5G38430)        | F: ATTACATATGGCTTCTCTATGCTCTCCT<br>R: ATTACTCGAGCCCATTGCTTGTGATGGAAG          |
| pGADT7<br>(Yeast two-hybrid) | PsbQ1<br>(AT4G21280)              | F: ATTAGAATTCATGGCTTCGATGGGTGGATT<br>R: CTAGCTCGAGTTAACCAAGCTTGGCAAGAACT      |
| pGADT7<br>(Yeast two-hybrid) | PsbQ2<br>(AT4G05180)              | F: TTAGCATATGATGGCTCAAGCAGTGACTTC<br>R: ATTAGAGCTCTTAACCGAGCTTGGCAAGAAC       |
| pGADT7<br>(Yeast two-hybrid) | PsbQ-Like1<br>(AT1G14150)         | F: ATTGCATATGATGAGCTCCTTCACCACCAC<br>R: ATCGCTCGAGTTAAGCAAGAACTCCACAAC        |
| pGADT7<br>(Yeast two-hybrid) | PsbQ-Like2<br>(AT3G01440)         | F: TGTCCATATGATGGCTCACTTCATAGACCT<br>R: TAATCTCGAGTCATGCCATTCTGGTCATTAC       |
| pGADT7<br>(Yeast two-hybrid) | PsbQ-Like3<br>(AT2G01918)         | F: TAATCATATGATGGCGATTTCAAAGCCACC<br>R: ACCGCTCGAGTTAAATTCGAGGGAAGATATC       |
| pGADT7<br>(Yeast two-hybrid) | PsaD1<br>(AT4G02770)              | F: ATTACATATGATGGCAACTCAAGCCGCCGG<br>R: GCTACTCGAGTTACAAATCATAACTTTGTTTGCCAG  |
| pGADT7<br>(Yeast two-hybrid) | PsaD2<br>(AT1G03130)              | F: ATTACATATGATGGCAACTCAAGCCGCCGG<br>R: GTCTCGAGTTACAAATCATAAGATTGTTTCCAGTG   |
| pGADT7<br>(Yeast two-hybrid) | PsaE1<br>(AT4G02770)              | F: ATTACATATGATGGCGATGACGACAGCATC<br>R: CTTACTCGAGTTAAGCTGCAACTTCTTCGACCT     |
| pGADT7<br>(Yeast two-hybrid) | PsaE2<br>(AT2G20260)              | F: ATTACATATGATGGCGATGACGTCAGCAGC<br>R: GTTACTCGAGTCATTTTACTTCTTCCACCTCGTCC   |
| pGADT7<br>(Yeast two-hybrid) | LeafFNR1<br>(AT5G66190)           | F: TTAGCATATGATGGCTGCTGCTATAAGTGC<br>R: TACGCTCGAGTTAGTAGACTTCAACATTCCACTG    |
| pGADT7<br>(Yeast two-hybrid) | LeafFNR2<br>(AT1G20020)           | F: ATTACATATGATGGCGACTACCATGAATGC<br>R: TCTACTCGAGTCAGTAGACTTCAACGTTCCATT     |
| pGADT7<br>(Yeast two-hybrid) | RootFNR1<br>(AT3G05390)           | F: ATTGCATATGATGGCTCTCTCAACTACTCC<br>R: GCTACTCGAGTCAATACACTTCAACATGCC        |
| pGADT7<br>(Yeast two-hybrid) | RootFNR2<br>(AT1G30510)           | F: ATTGCATATGATGTCTCACTCTGCTGTTTCT<br>R: CTTACTCGAGTCAATAGACTTCAACGTGCC       |
| pGADT7<br>(Yeast two-hybrid) | LeafFd1<br>(AT1G10960)            | F: ATTACATATGATGGCTTCCACTGCTCTCTCC<br>R: ATTACTCGAGTTACATAATGGCTTCTTCTTTGTGG  |
| pGADT7<br>(Yeast two-hybrid) | LeafFd2<br>(AT1G60950)            | F: ATTGCATATGATGGCTTCCACTGCTCTCTC<br>R: GTCACTCGAGTTAAACAATGTCTTCTTCTTTGTGG   |
| pGADT7<br>(Yeast two-hybrid) | 1-251aaToc33<br>(AT1G02280)       | F: ATTACATATGATGGGGTCTCTCGTTTCGTG<br>R: ATTACCCGGGTTAGTCTACATGAATTGCTTTCCTC   |
| pGADT7<br>(Yeast two-hybrid) | 1-254aaToc34<br>(AT5G05000)       | F: ATTACATATGATGGCAGCTTGGCAAACGCT<br>R: ATTACCCGGGTTACTTGTCAACATGAATCGCCTT    |
| pGADT7<br>(Yeast two-hybrid) | PGR5-Like1A<br>(AT4G22890)        | F: ATTGCATATGATGGGTAGCAAGATGTTGTT<br>R: TAATCTCGAGTTAAGCTTGGCTTCCCTTCTG       |
| pGADT7<br>(Yeast two-hybrid) | PGR5-Like1B<br>(AT4G11960)        | F: ATTGCATATGATGGCTTTTACTCTAACAATCC<br>R: AACTGAGCTCTTAAGCTTTCCCTCCTTCTG      |
| pGADT7<br>(Yeast two-hybrid) | FTRA1<br>(AT5G23440)              | F: ATTGCATATGATGAGTAGCCAAATCGCTTTGT<br>R: TACTGAGCTCTCACTGATCAATGAACCTCGAACTC |
| pGADT7<br>(Yeast two-hybrid) | FTRA2<br>(AT5G08410)              | F: ATTGCATATGATGACTAACAGTTACGCTCTGTC<br>R: ATTACTCGAGTCACGGATCAATTAACCTCGAAC  |
| pGADT7<br>(Yeast two-hybrid) | FTRB<br>(AT2G04700)               | F: AGCTGAATTCATGAATCTTCAAGCTGTTTC<br>R: ATCGCTCGAGTCACATGTTAGCTGTAGTTTC       |

|                              |                              |                                                                                                  |
|------------------------------|------------------------------|--------------------------------------------------------------------------------------------------|
| pGADT7<br>(Yeast two-hybrid) | LHCA1<br>(AT3G54890)         | F: TAAT <u>CATAT</u> G GCGTCGAACTCGCTTAT<br>R: TAAT <u>CATATG</u> T TAGTTGAAAGGGATAACAAT         |
| pGADT7<br>(Yeast two-hybrid) | LHCB2.2<br>(AT2G05070)       | F: TAAT <u>CATATG</u> GCCACATCAGCTATCCAAC<br>R: TAAT <u>CTCGAG</u> T TACTTTCCGGGGACAAAGTT        |
| pGADT7<br>(Yeast two-hybrid) | LHCB3<br>(AT5G54270)         | F: TAAT <u>CATATG</u> G CATCAACATTCACGAGC<br>R: TAAT <u>CTCGAG</u> T TAAGCTCCAGGTGCAAAC          |
| pGADT7<br>(Yeast two-hybrid) | LHCB5<br>(AT4G10340)         | F: TAAT <u>CATATG</u> GCGTCTTTGGGTGTGTC<br>R: TAAT <u>CTCGAG</u> T TAGAGAGTGGGAGCTCTCTC          |
| SPYCE<br>(BiFC)              | AtPAP2<br>(AT1G13900)        | F: ATCG <u>ACTAGT</u> ATGATCGTTAATTTCTCTTTCTTC<br>R: GAAT <u>ACTAGT</u> TTATGTCTCCTCGTTCTTGACTG  |
| SPYCE<br>(BiFC)              | Multiple cloning site        | F: ATTAG <u>GAGCTC</u> GTTAACCGGGCTCAGGCCT<br>R: ATTAG <u>GAGCTC</u> CCCCGGGAGCGGTACCCTC         |
| SPYCE<br>(BiFC)              | YFP <sup>C</sup>             | F: TAACT <u>CTAGA</u> ATGTACCCATACGATGTTCCAG<br>R: ATTAG <u>GAGCTC</u> CTTGTACAGCTCGTCCATG       |
| SPYNE<br>(BiFC)              | PsaE1<br>(AT4G28750)         | F: GAAC <u>TCTAGA</u> ATGGCGATGACGACGACAT<br>R: ATTAG <u>CTGAGAG</u> CTGCAACTTCTTCGACCTC         |
| SPYNE<br>(BiFC)              | PsaE2<br>(AT2G20260)         | F: ATTAT <u>CTAGA</u> ATGGCGATGACGTCAGCAGC<br>R: TAAT <u>CTCGAG</u> T TTTTACTTCTTCCACCTCGTCCAAT  |
| SPYNE<br>(BiFC)              | FTRA1<br>(AT5G23440)         | F: ATTAT <u>CTAGA</u> ATGAGTAGCCAAATCGCTTT<br>R: ATTAG <u>CTGAGCT</u> GATCAATGAACTCGAACTC        |
| SPYNE<br>(BiFC)              | FTRA2<br>(AT5G08410)         | F: CTAG <u>TCTAGA</u> ATGACTAACAGTTACGCTCTGTC<br>R: ATTAG <u>CTGAGCG</u> GATCAATTAACCTCGAACTC    |
| SPYNE<br>(BiFC)              | FTRB<br>(AT2G04700)          | F: ATTAT <u>CTAGA</u> ATGAATCTTCAAGCTGTTTCTTG<br>R: ATTAG <u>CTGAGCAT</u> GTTAGCTGTAGTTTCTTTTATT |
| SPYNE<br>(BiFC)              | LeafFd1<br>(AT1G10960)       | F: ATTAT <u>CTAGA</u> ATGGCTTCCACTGCTCTCTCC<br>R: TAAT <u>CTCGAG</u> CATAATGGCTTCTTCTTTGTGG      |
| SPYNE<br>(BiFC)              | LeafFd2<br>(AT1G60950)       | F: ATT <u>GCTAGA</u> ATGGCTTCCACTGCTCTCTC<br>R: ATTAG <u>CTGAGA</u> ACAATGTCTTCTTCTTTGTGGG       |
| SPYNE<br>(BiFC)              | Toc33<br>(AT1G02280)         | F: ATTAT <u>CTAGA</u> ATGGGGTCTCTCGTTTCGTGAAT<br>R: CCTAT <u>CTAGAA</u> AGTGGCTTTCCACTTGTCTTGAT  |
| SPYNE<br>(BiFC)              | Toc34<br>(AT5G05000)         | F: ATTAT <u>CTAGA</u> ATGGCAGCTTTGCAAACGCT<br>R: GAAT <u>TCTAGA</u> AGACCTTCGACTTGCTAAACCG       |
| SPYNE<br>(BiFC)              | PsbQ-Like1<br>(AT1G14150)    | F: ATT <u>GACTAGT</u> ATGAGCTCCTTACCACCAC<br>R: ATTAG <u>CTGAGAG</u> CAAGAACTCCACAACATT          |
| SPYNE<br>(BiFC)              | PsbQ-Like3<br>(AT2G01918)    | F: ATT <u>CACTAGT</u> ATGGCGATTTCAAAGCCACC<br>R: ATTAG <u>CTGAGA</u> AATTCGAGGGAAGATATCATCGAG    |
| SPYNE<br>(BiFC)              | 42-181aaSSU1B<br>(AT5G38430) | F: ATT <u>CTCTAGA</u> ATGGACATTACTTCCATCACAAGC<br>R: ATTAG <u>CTGAGAG</u> CATCAGTGAAGCTTGGGG     |
| SPYNE<br>(BiFC)              | 1-50aaSSU1B<br>(AT5G38430)   | F: ATTAT <u>CTAGA</u> ATGGCTTCTCTATGCTCTCCT<br>R: ATTAG <u>CTGAG</u> CCCATTGCTTGTGATGGAAG        |
| pCXSN<br>(Transgenic line)   | TOC33overlap<br>(At1g02280)  | F: ATCAGTGGGAGCAAAGTAGATGGATCTTACTCT<br>R: GTAAGATCCATCTACTTTGCTCCCACTGATTAC                     |

---

<sup>1</sup> Restricted sites are indicated by underline.
